# Supplementary material for: A linear nonribosomal octapeptide from Fusarium graminearum facilitates cell-to-cell invasion of wheat
Source: PubMed Central journal article supplement (PMC6389888; doi:10.1038/s41467-019-08726-9), 2019-02-25
Supplement: 41467_2019_8726_MOESM1_ESM.pdf [file 41467_2019_8726_MOESM1_ESM.pdf]

**Supplementary Information**

**A Linear Nonribosomal Octapeptide from *Fusarium graminearum* Facilitates  
Cell-to-Cell Invasion of Wheat**

**Jia *et al.***

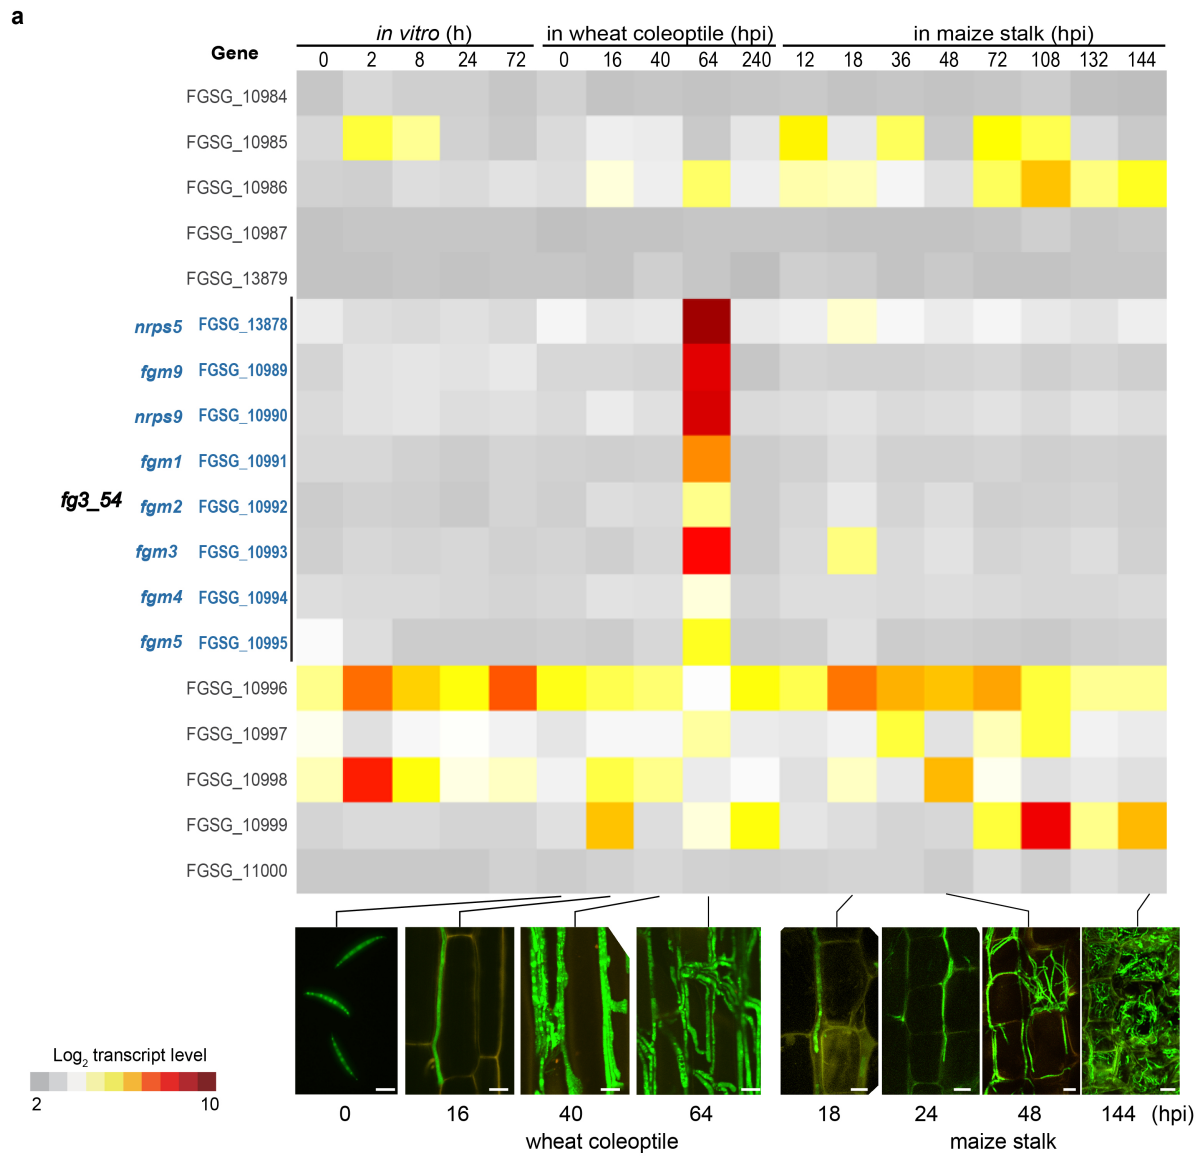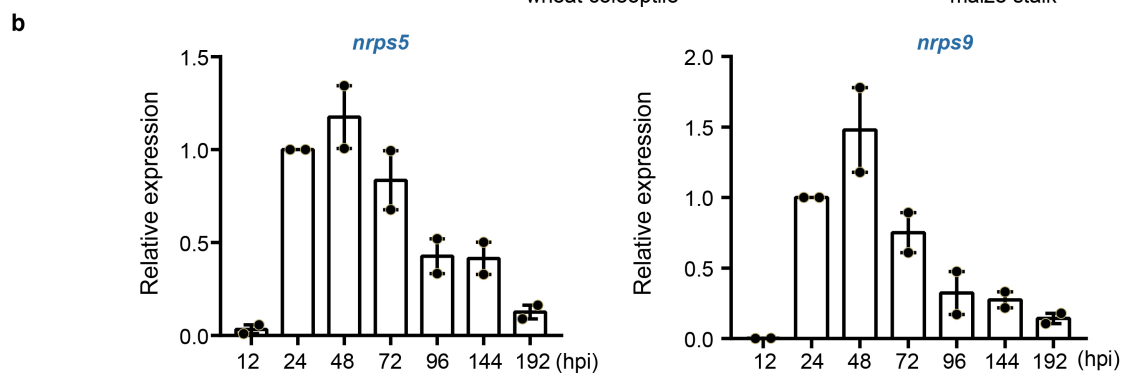

**Supplementary Figure 1 : Expression analysis of *F. graminearum* *fg3\_54* cluster and flanking genes. a**, Heat map presentation of expression data from previous laser microdissection-facilitated microarray analysis<sup>1-3</sup>. Plexdb: FG7, FG19. GEO: GSE53854. hpi: hours post inoculation. Representative images of *F. graminearum* WT-*AmCyan* at indicated time (below) during wheat coleoptile infection and maize stalk infection are from previous work<sup>2,3</sup>. **b**, Quantitative RT-PCR analysis of *nrps5* and *nrps9* during infection. Samples at 24 hpi were used as control. Data are means  $\pm$  s.e.m. (n=2).

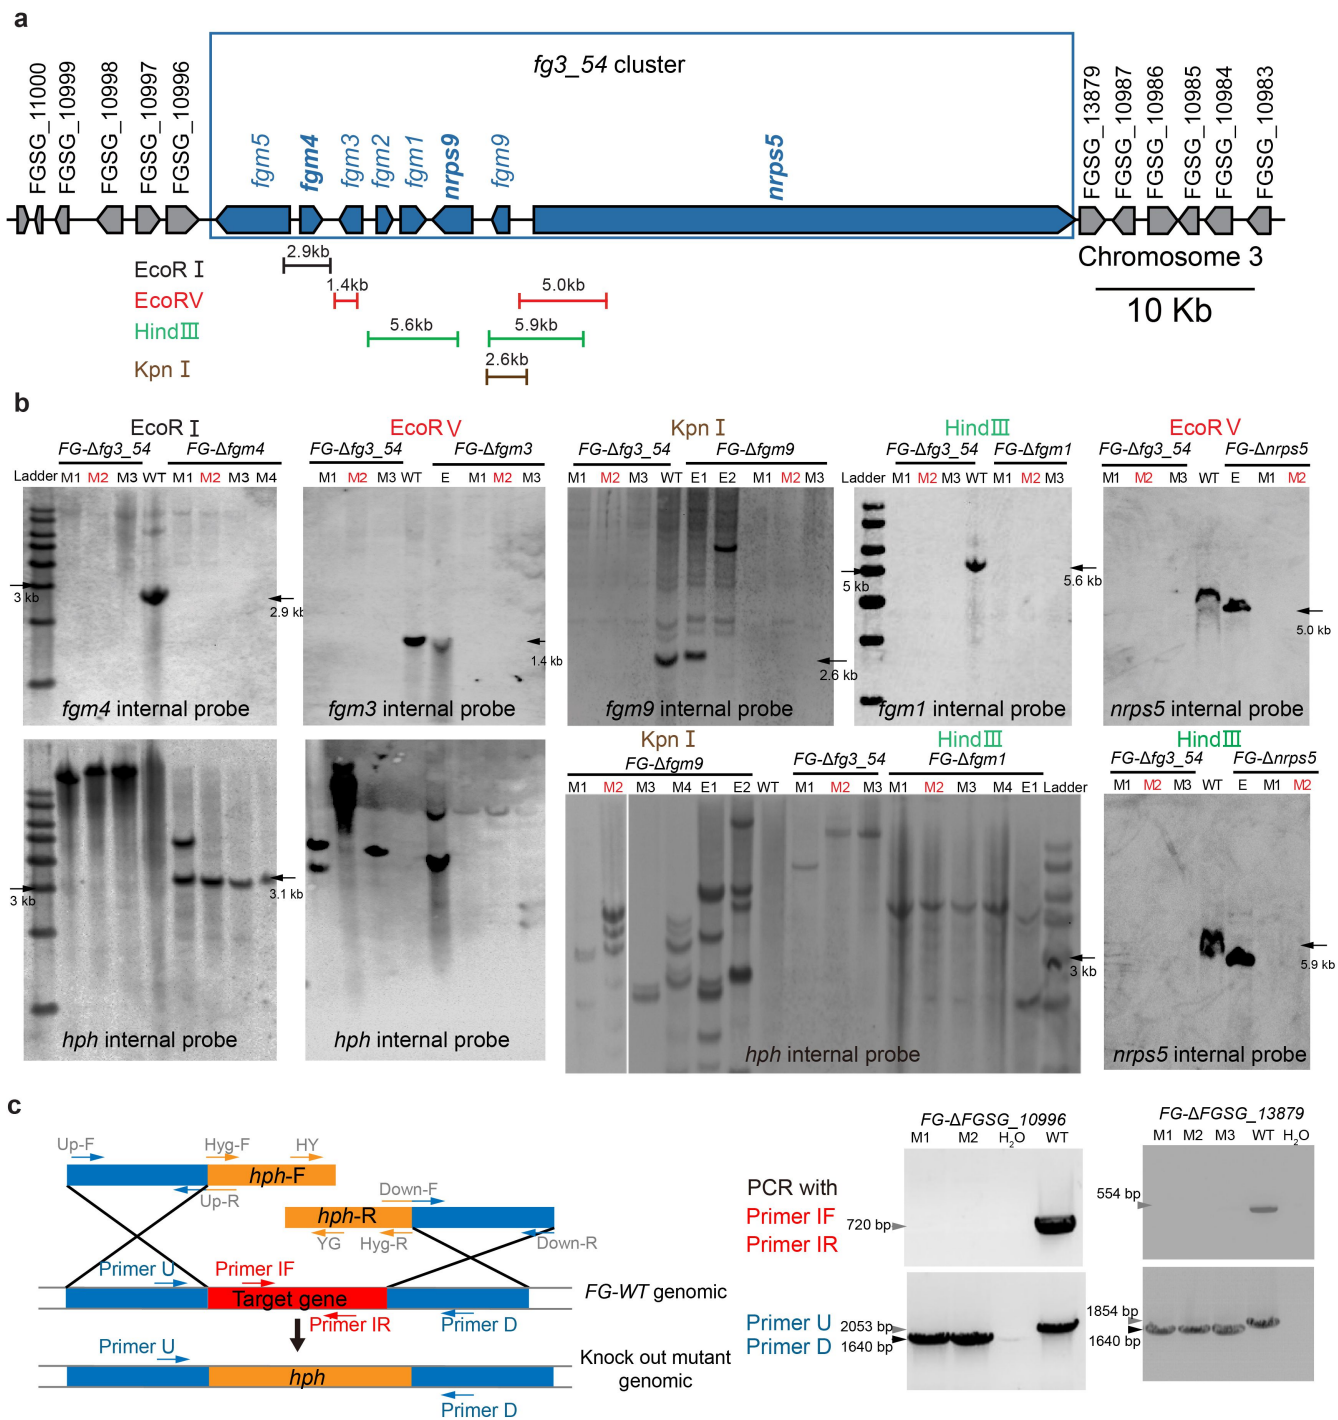

**Supplementary Figure 2: Verification of *F. graminearum* gene deletion mutants. a**, Restriction map of *fg3\_54* gene cluster. **b**, Southern blot identification of gene deletion mutants with individual target gene probes and the replaced hygromycin B phosphotransferase gene (*hph*) probe using indicated restriction enzymes. **c**, Genomic DNA PCR verification of gene deletion mutants. Corresponding positions of the primers used for PCR are illustrated in the homologous recombination diagram. M1, M2, M3 and M4 represent independent transgenic lines of homologous recombination mutants. E, ectopic transformants. WT, wild-type strain PH-1. The line used for *fgm4* overexpression strain construction are in red.

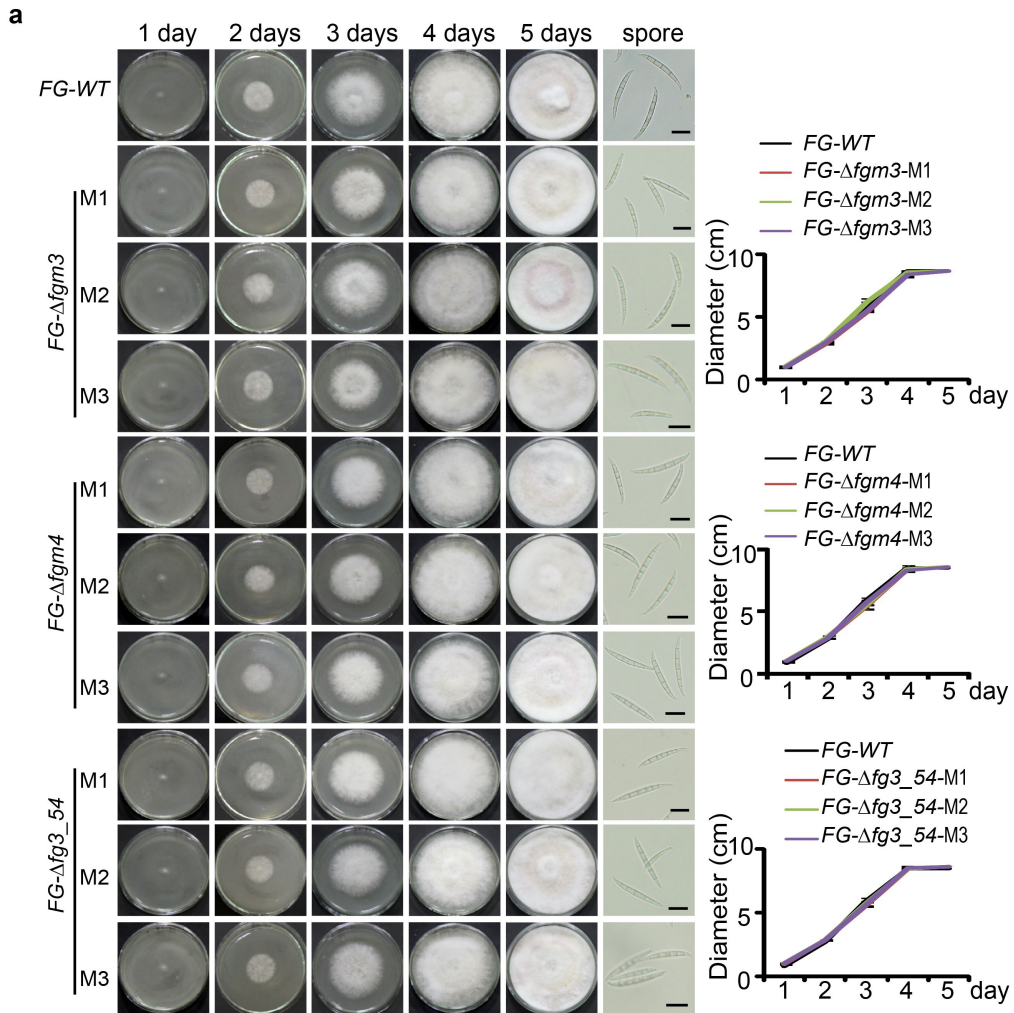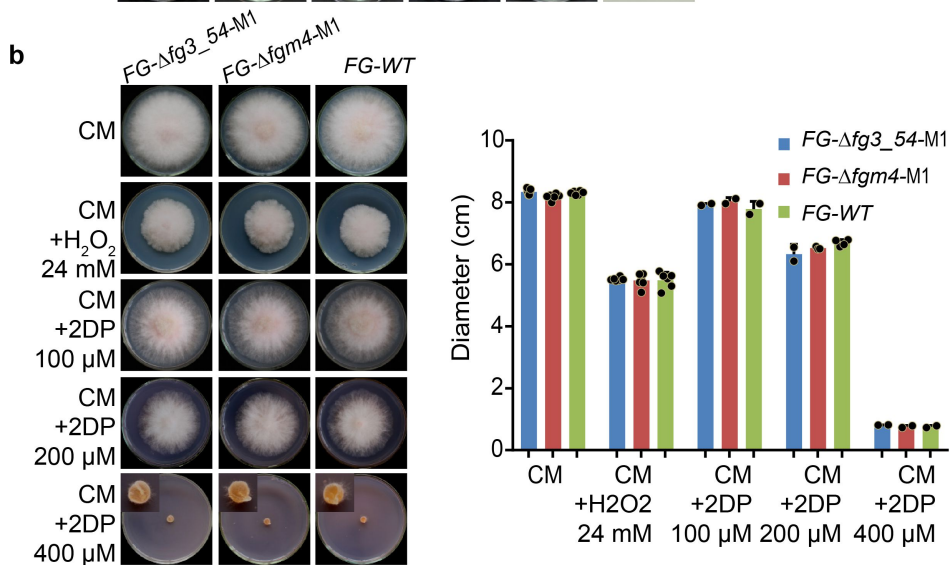

**Supplementary Figure 3: *fg3\_54*-related mutants showed no defect during in vitro culture. a.** Representative pictures of *F. graminearum* strains growing on potato dextrose agar medium and spores from mung bean liquid medium. Scale bars represent 20  $\mu$ m. **b.** Representative images of *F. graminearum* strains growing on complete medium (CM) supplemented with H<sub>2</sub>O<sub>2</sub> or the iron chelator 2,2'-dipyridyl (2DP). Four-day-old cultures were photographed.

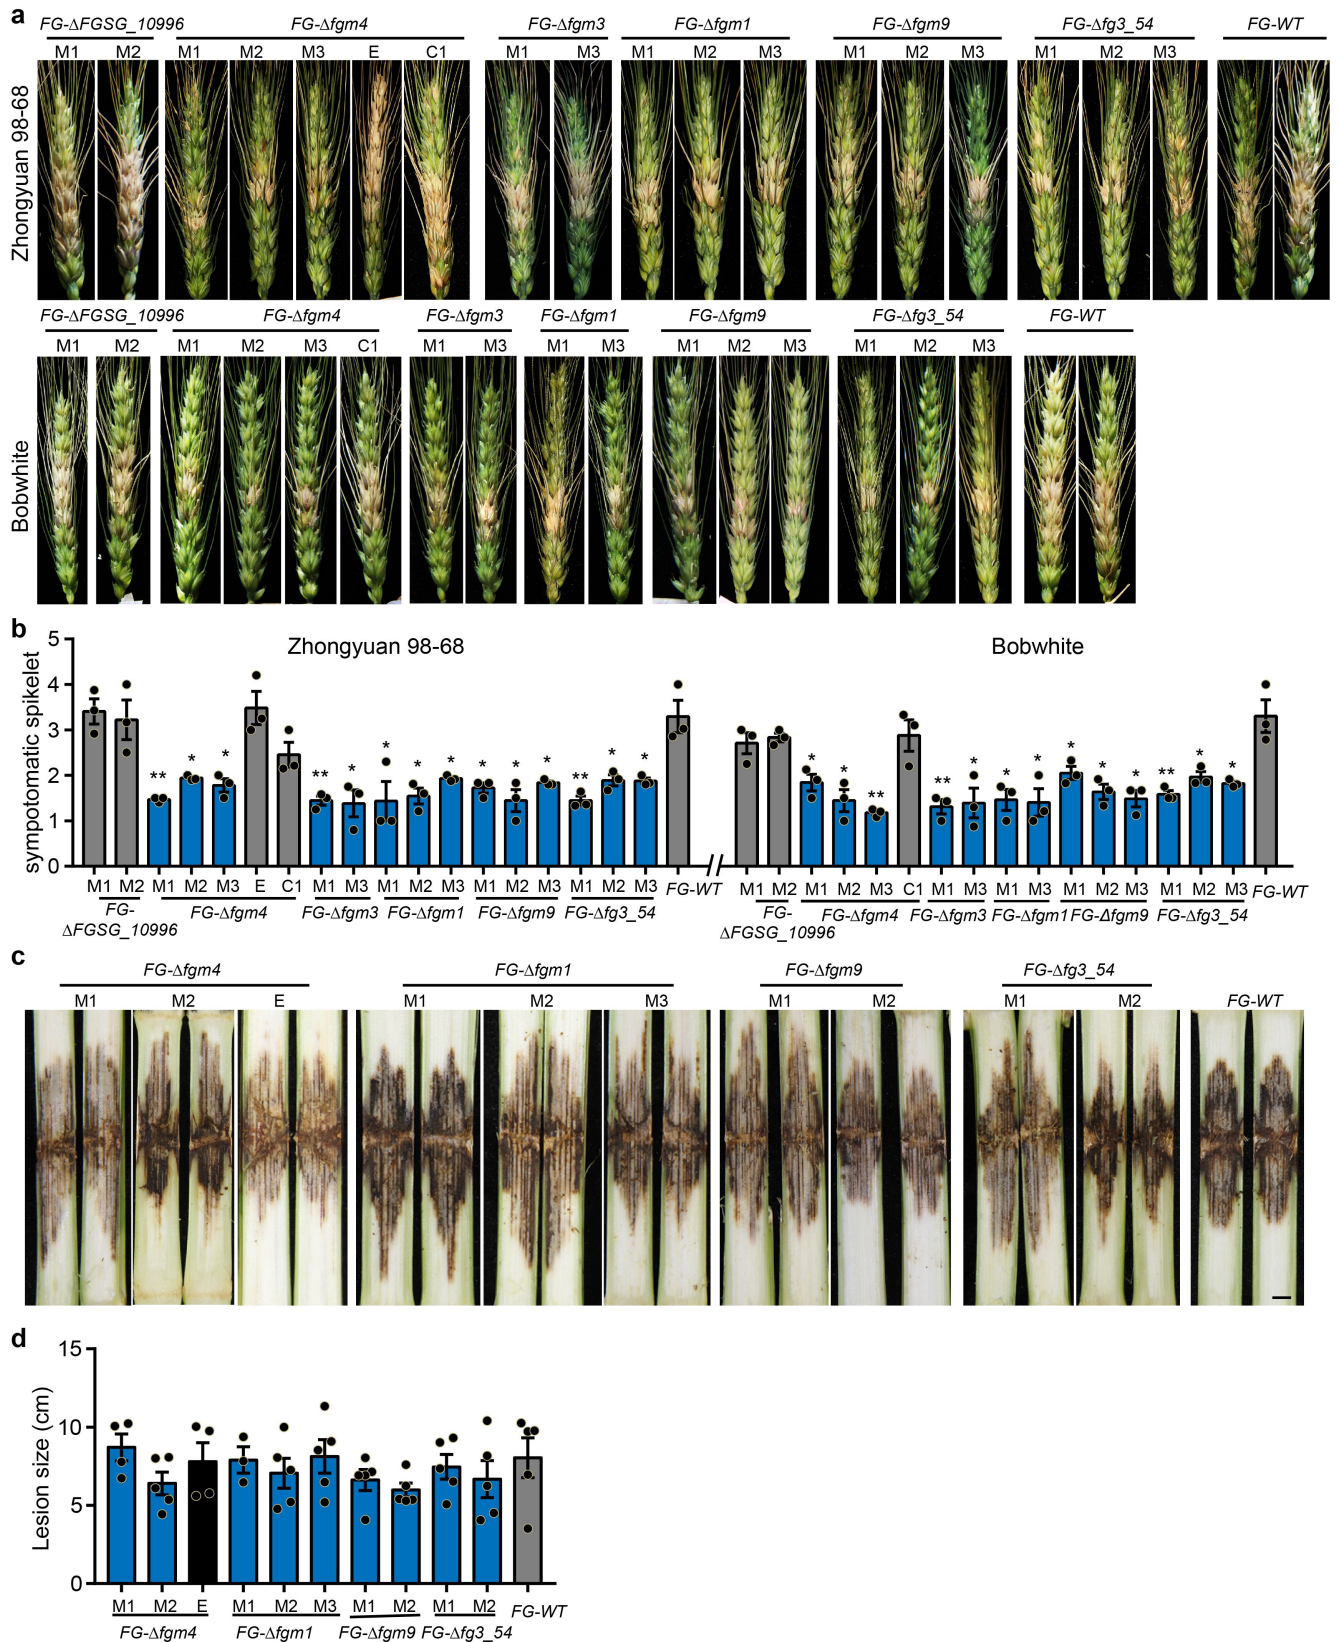

**Supplementary Figure 4: *fg3\_54* is required for full virulence on wheat spikes, but not on maize stalks. a**, Representative images of spikes of wheat cultivars Zhongyuan 98-68 and Bobwhite at 14 days post inoculation with the wild type (WT) or indicated mutants of *F. graminearum*. **b**, Charts showing the measurements of symptomatic spikelet numbers at 14 dpi after inoculation with the indicated strains. Data are means $\pm$ s.e.m. (n=3). Asterisks indicate statistically significant differences compared with the WT. \*\*P<0.01, \*P<0.05 (Student's *t*-test). **c**, Representative images of maize (B73) stalks inoculated with indicated strains at 7 dpi. Scale bar represents 1 cm. **d**, Charts of lesion sizes in split stalks at 7 days after inoculated by indicated strains. Data are means $\pm$ s.e.m. (n=3).

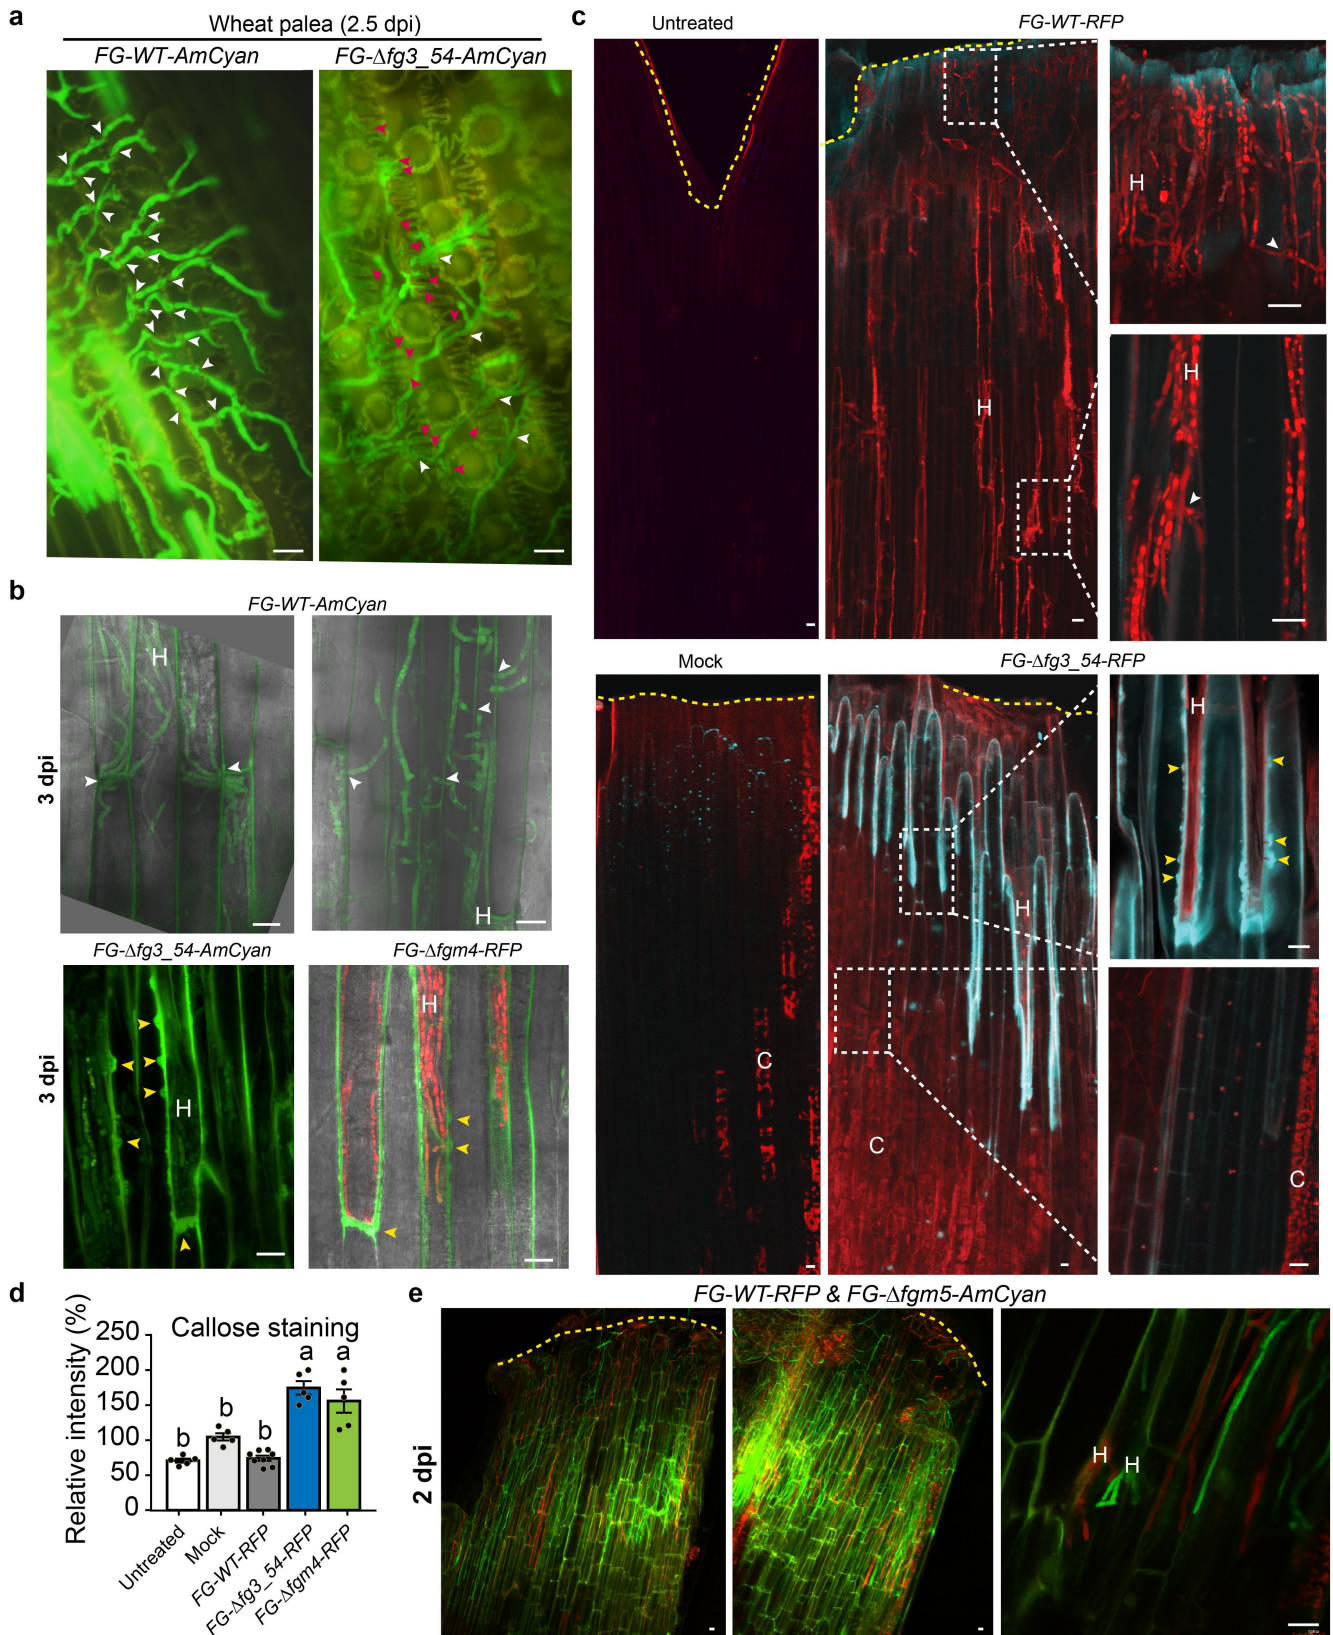

**Supplementary Figure 5: Micrographs of *F. graminearum* growing inside wheat tissues.** **a**, Growth of fluorescence-tagged fungal strains inside epidermis of palea at 2.5 dpi. White arrowheads indicate where hyphae penetrated host cell, and red arrowheads indicate where hyphae made unsuccessful attempts to penetrate host cell wall. **b**, Growth of fluorescence-tagged fungal strains inside coleoptiles at 3 dpi. Confocal fluorescent images were overlaid with DIC images. White arrowheads indicate where hyphae penetrated host cell wall, and yellow arrowheads indicate where plant cell wall thickened to form papillae-like structure. **c-d**, Coleoptiles were stained with aniline blue and the callose signal intensity was pictured (c) and quantified at 3 dpi (d). Yellow broken lines mark the wounded edge of coleoptiles where fungal spores were inoculated. Data are means  $\pm$  s.e.m. (n=3). Levels not connected by the same letters are significantly different ( $P < 0.05$ ) in One-way ANOVA following Tukey's multiple comparison test ( $F=31.84$ ,  $df=4$ ,  $P<0.0001$ ). **e**, The RFP-tagged WT and AmCyan-tagged mutant strains were co-inoculated on wounded coleoptiles and examined under a microscope at 2 dpi. Scale bars represent 20  $\mu$ m.

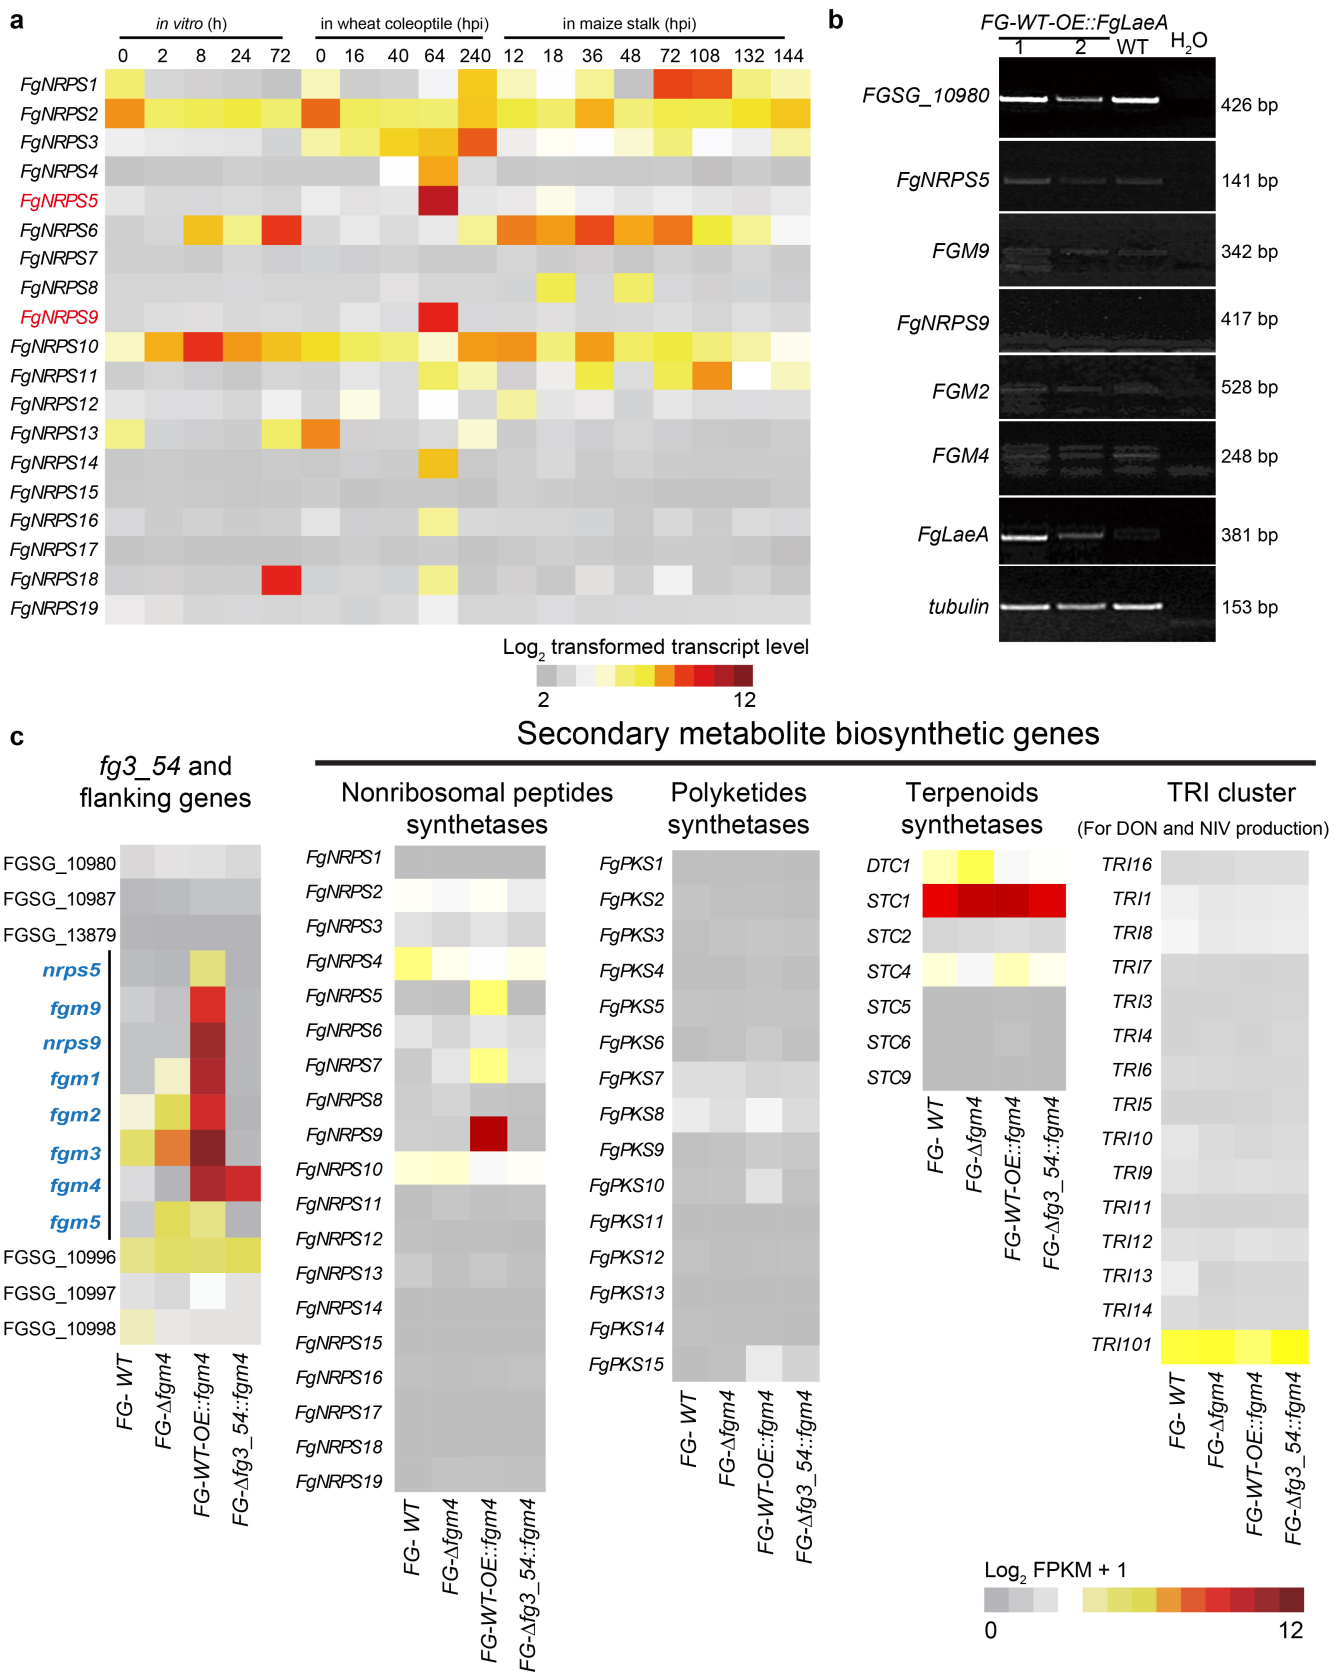

**Supplementary Figure 6: Expression analysis of *fg3\_54* and other secondary metabolic genes of *F. graminearum*.** **a**, Heat map showing the expression of *F. graminearum* non-ribosomal peptide synthetase (NRPS) genes based on the microarray data<sup>1-3</sup>. **b**, RT-PCR analysis of *fg3\_54* expression in the *FgLaeA* over-expression strains. 1 and 2 represent independent transgenic lines. Aerial mycelia of 3-day-old fungal colonies on V8 agar were used for RNA extraction. **c**, Heat map showing the expression of *F. graminearum* *fg3\_54*-related, secondary metabolism structural genes and trichothecene biosynthetic pathway genes based on RNA-seq analysis of indicated fungal strains. PKS, polyketide synthase; TC, terpene cyclase; DTC, diterpene cyclase; STC, sesquiterpene cyclase.

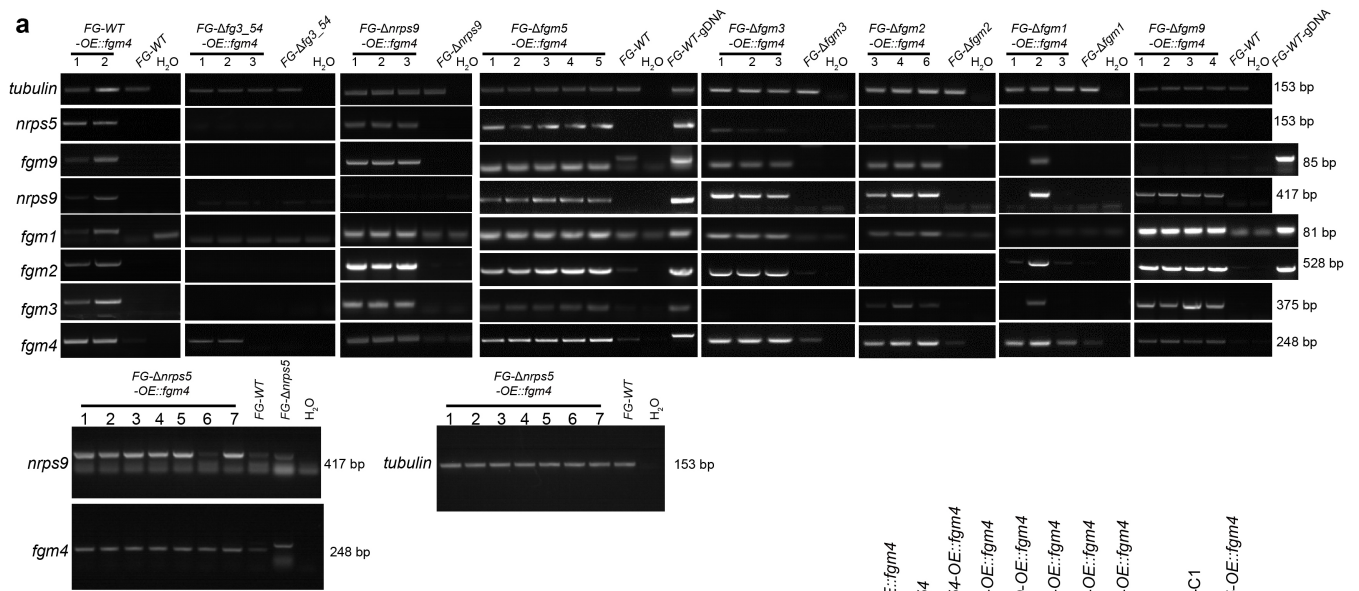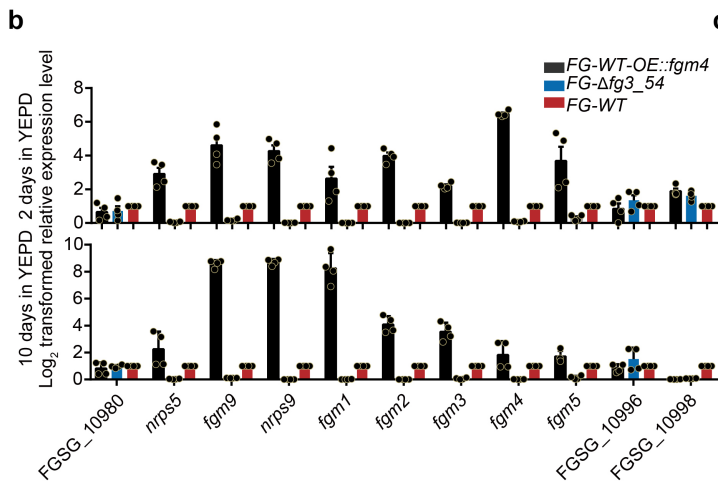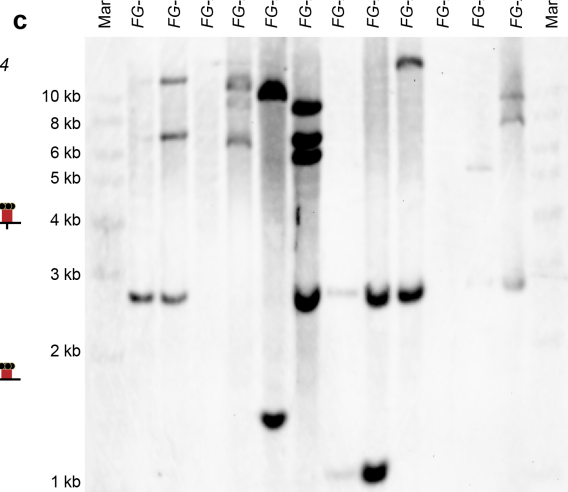

**Supplementary Figure 7: RT-PCR (a), quantitative RT-PCR (b) and Southern blot (c) analysis of *fgm4* constitutive-expressing strains. a**, RT-PCR analysis of *fg3\_54* cluster gene expression. Numbers represent independent transgenic lines. Aerial mycelia of 3-day-old fungal colonies on V8 agar were used for RNA extraction. **b**, Quantitative RT-PCR analysis of *fg3\_54* cluster gene expression. Mycelia growing in the YEPD media were used for RNA extraction. Data are means  $\pm$  s.e.m. (n=3). **c**, Southern blot analysis of representative *fgm4* constitutive-expressing strains. An intronless *fgm4* genomic DNA fragment is used as probe template.



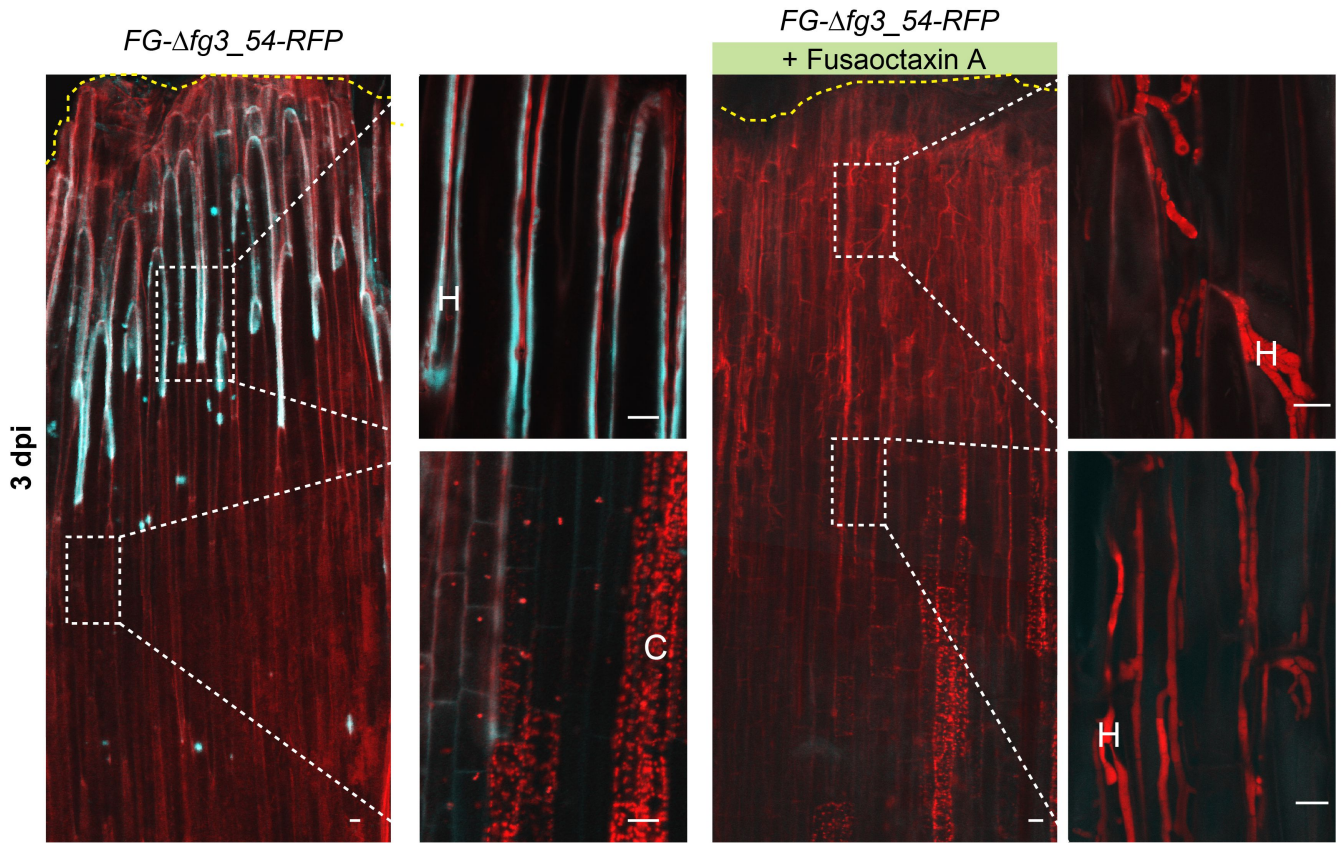

**Supplementary Figure 8: Fluorescence microscopic analysis of wheat coleoptiles inoculated with *FG-Δfg3\_54-RFP* strain and stained with aniline blue for callose at 3 dpi.** White scale bars represent 20 μm. Images are overlays of CFP (callose staining) and RFP (fungal hyphae) channels.

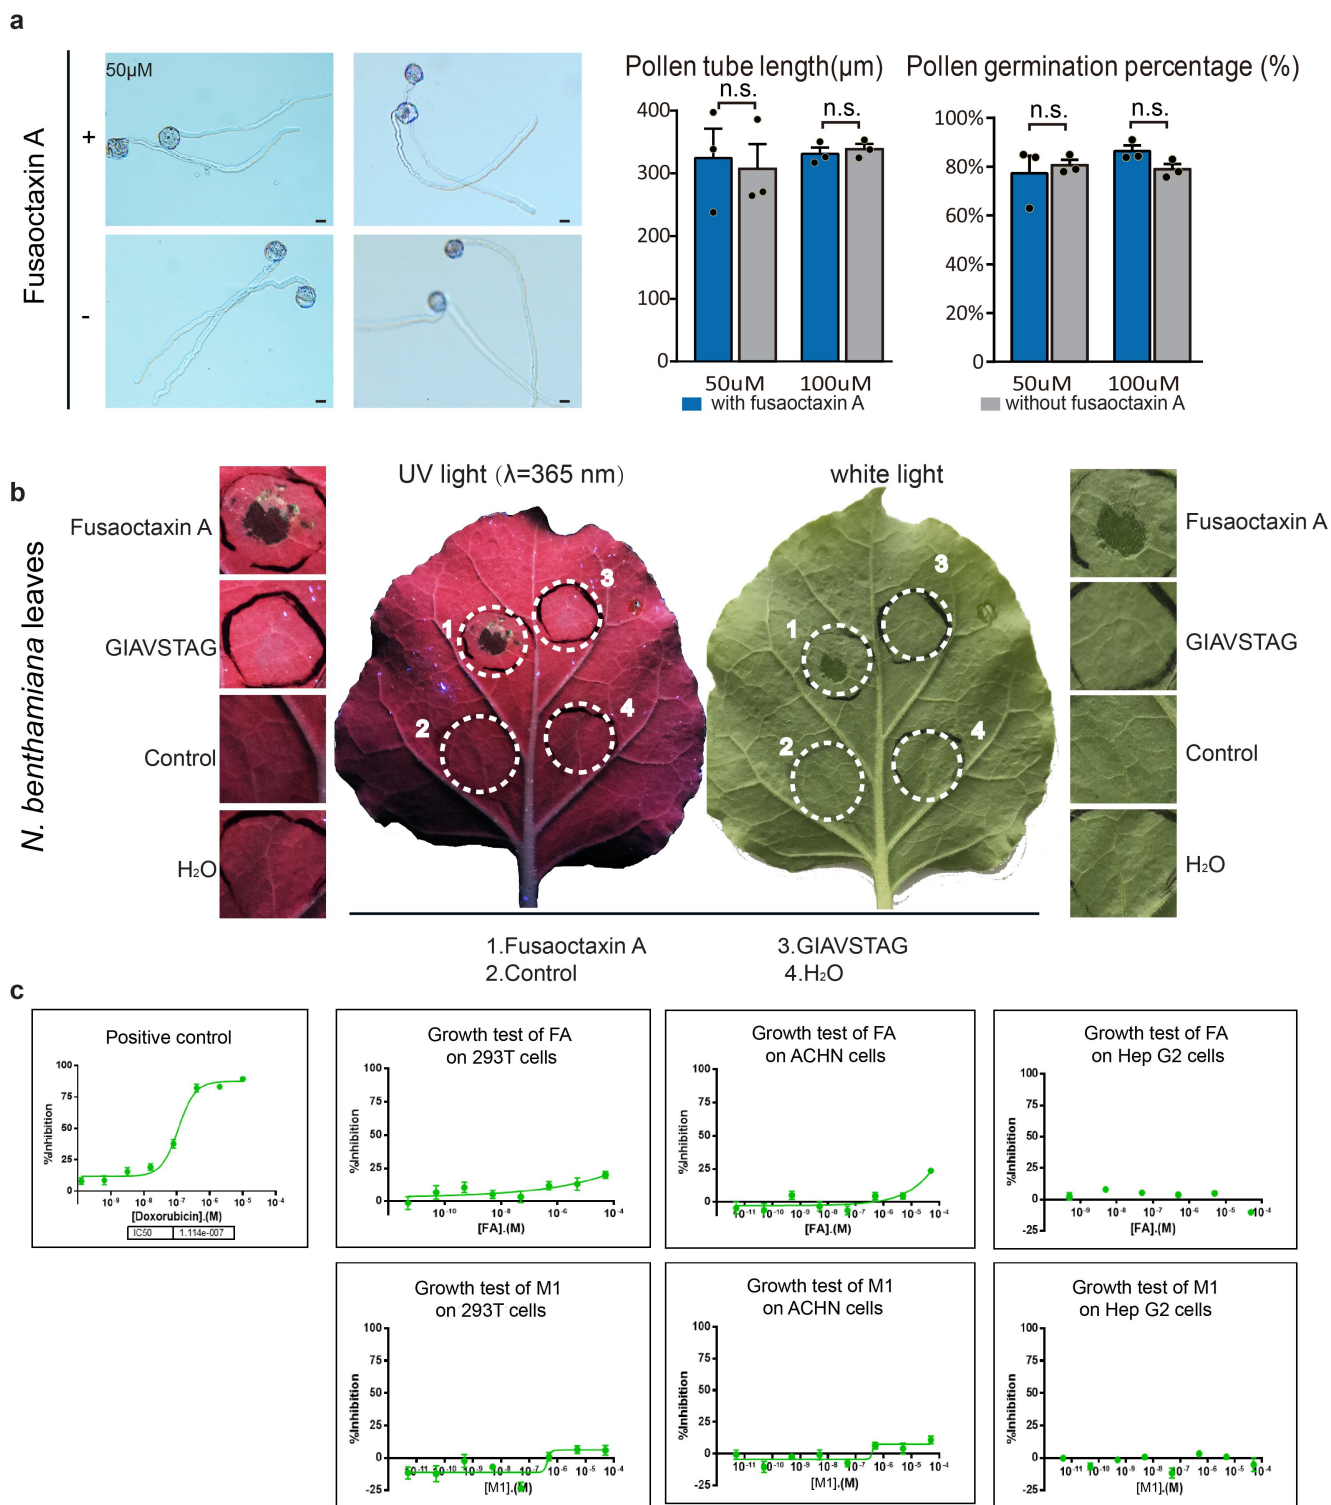

**Supplementary Figure 9: Cytotoxicity assays of fusaoctaxin A.** **a**, Representative pictures of tobacco pollen tubes grown in vitro with or without fusaoctaxin A. Scale bar represents 20 µm. Pollen tube length (bar graphs, left axis) and percentage of germinated pollen (lines, right axis) are charted. Data are means ± s.e.m. (n = 3). ns, no significant difference in student's *t*-test. **b**, The addition of fusaoctaxin A caused cell death of *N. benthamiana* leaves. Circles with broken line indicate infiltrated areas with indicated compounds. The experiment was replicated three times. GIAVSTAG: a control octapeptide. **c**, Inhibition effects of fusaoctaxin A on growth of mammalian cells were negligible. Positive Control is the inhibition of proliferation of BEL-7402 cells with Doxorubicin. The x-axis indicates the concentration of compounds and the y-axis represents the percentage of inhibition. FA: Fusaoctaxin A, M1: GIAVSTAG. Data are means ± s.d. (technical repeats n=3)

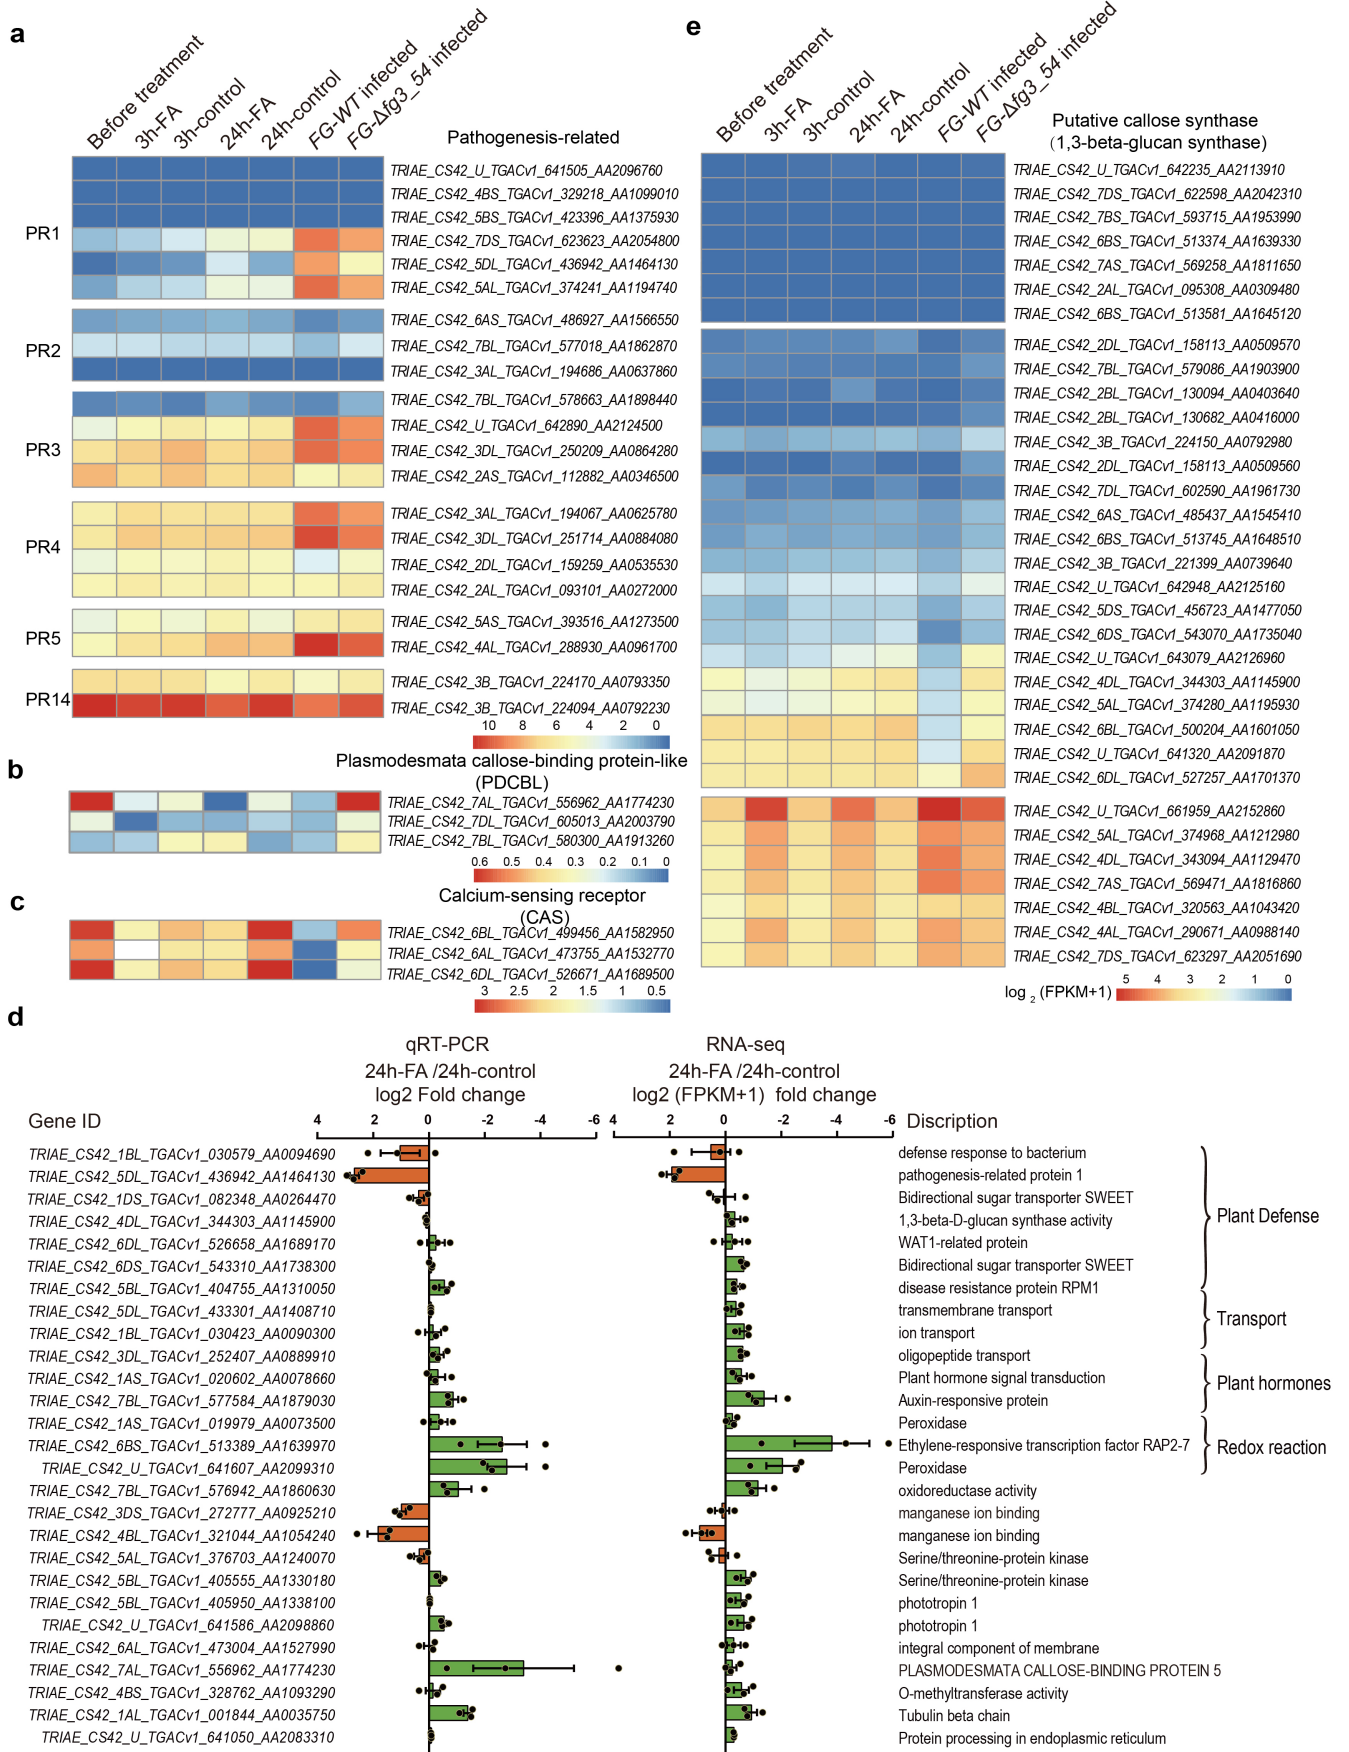

**Supplementary Figure 10: Quantitative RT-PCR and RNA-seq analysis of wheat genes expression.** a-c, Heat map showing the expression of wheat pathogenesis-related genes, plasmodesmata callose-binding protein-like genes and putative calcium-sensing receptor genes, based on the RNA-seq data. d, Charts showing the comparison of Quantitative RT-PCR (left) and RNA-seq results (right). Value represent the  $\log_2$  (fold change) between wheat coleoptiles treated with fusaoctaxin A and control for 24 h. Data are means  $\pm$  s.e.m. (n=3). Green represents down-regulated genes, and red represents up-regulated genes. e, Heat map showing the expression of wheat putative 1,3-beta-glucan

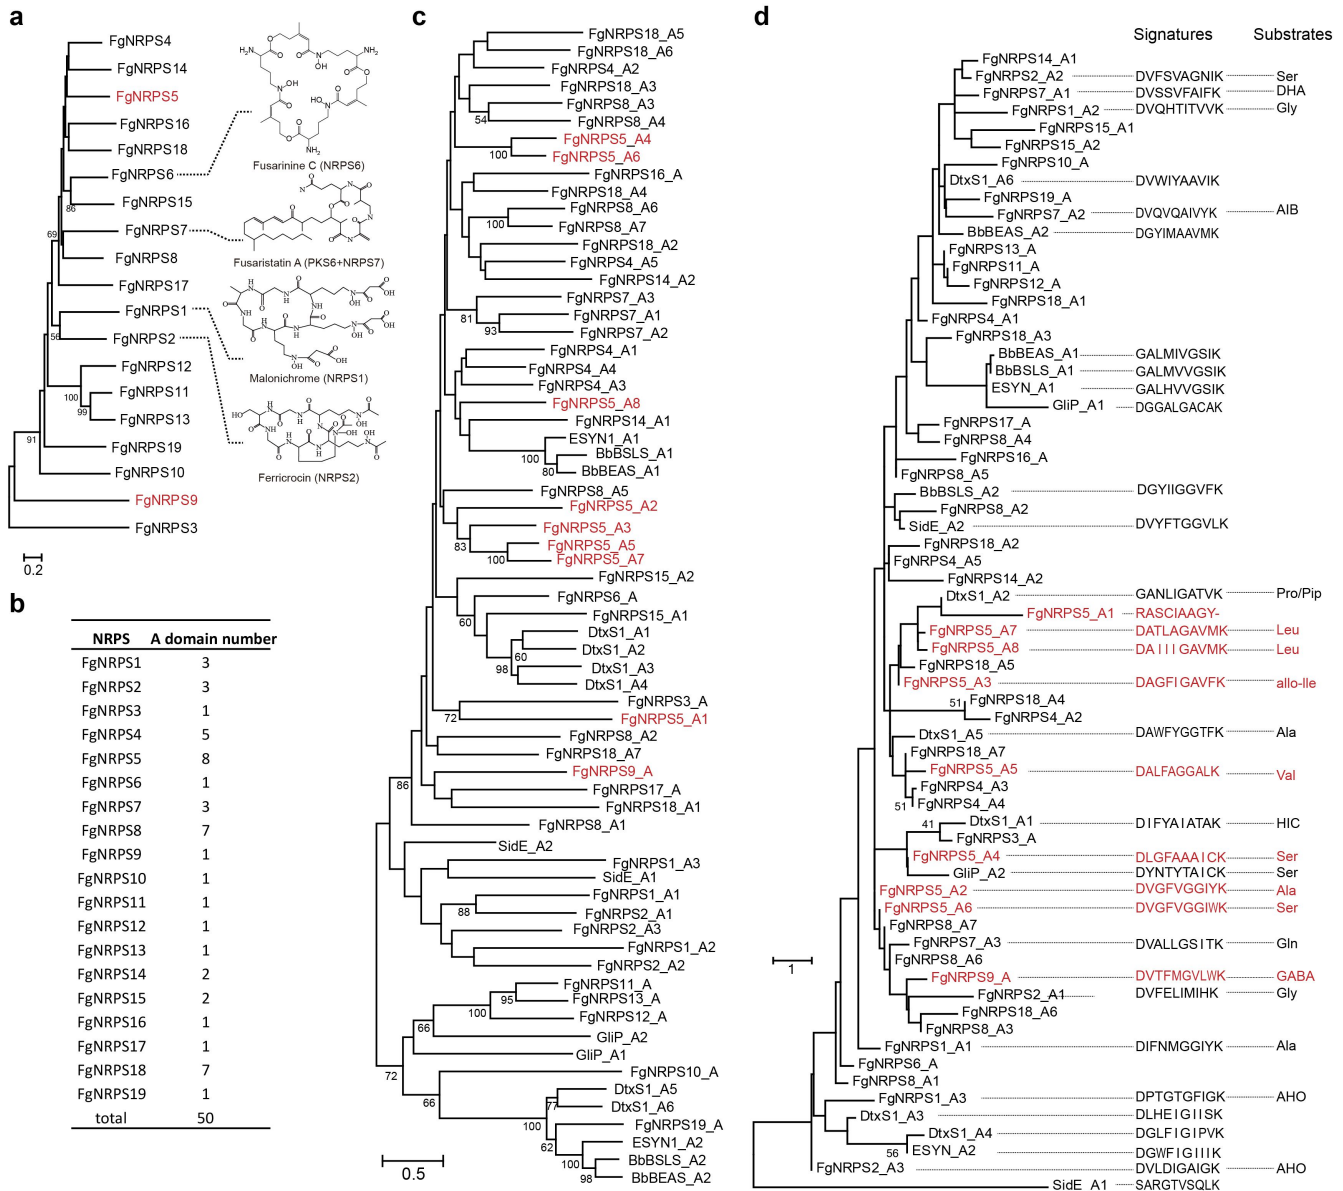

**Supplementary Figure 11: Phylogenetic analysis of *F. graminearum* NRPS A domains and FgNRPS5 Stachelhaus codes.** **a**, Phylogenetic tree obtained by Neighbor-Joining analysis of protein sequences of *F. graminearum* NRPSs. The numbers at the internal nodes indicate the percentage of replicate trees in which the associated taxa clustered together in a bootstrap test of 1,000 replicates. Four *F. graminearum* NRPS products are listed on the right<sup>4</sup>. **b**, A domain number of *F. graminearum* NRPSs. **c**, Maximum likelihood (ML) tree based on A domain protein sequences of *F. graminearum* and several other fungal NRPSs (LG model, gamma distributed, bootstrap=1,000). ESYN1, Enniatin synthetase of *F. equiseti*<sup>5</sup>; BbBSLS, Bassianolide synthetase of *Beauveria bassiana*<sup>6</sup>; BbBEAS, Beauvericin synthetase of *B. bassiana*<sup>7</sup>; SidE, Fumarylalanine synthetase of *Aspergillus fumigatus*<sup>8</sup>; GliP, Gliotoxin synthetase of *A. fumigatus*<sup>9</sup>; DtxS1, Dextruxin synthetase of *Metarhizium robertsii*<sup>10</sup>. **d**, ML tree based on A domain signatures (i.e. Stachelhaus code) (LG model, Gamma distributed, bootstrap=1,000). AHO, N-Hydroxy-ornithine; AIB,  $\beta$ -aminoisobutyric acid; DHA, dehydroalanine; HIC,  $\alpha$ -hydroxyisocaproic acid; Pip, Pipecolic acid. NRPS protein sequences were analyzed with CDD<sup>11</sup> (conserved domains database) and NRSPredictor<sup>12</sup>.

**Supplementary Table 1: Plant materials and fungal strains used in this study.**

| Plant | Botanical name           | Cultivar        | Source                                                                        |
|-------|--------------------------|-----------------|-------------------------------------------------------------------------------|
| Wheat | <i>Triticum aestivum</i> | Zhongyuan 98-68 | Guoshenmai 2004006, Henan, China                                              |
| Wheat | <i>Triticum aestivum</i> | Bobwhite        | CIMMYT Vasil, Vimla, et al. 1993 <sup>13</sup>                                |
| Maize | <i>Zea mays</i>          | B73             | Russell, W. A. 1972 <sup>14</sup> ; Schnable, P. S. et al. 2009 <sup>15</sup> |

  

| Short name          | Strain name                                            | Identifier                                                                              | Origin/Reference                                            |
|---------------------|--------------------------------------------------------|-----------------------------------------------------------------------------------------|-------------------------------------------------------------|
| FG-WT               | <i>Fusarium graminearum</i> PH-1                       | Agricultural Research Collection NRRL 31084                                             | Lab stock                                                   |
| Foc TR4             | <i>Fusarium oxysporum</i> f.sp.cubense tropical race 4 | Agricultural Research Collection NRRL 54006                                             | Gift from Drs. Sijun Zheng <sup>16</sup>                    |
| <i>F. avenaceum</i> | <i>Fusarium avenaceum</i> M130-N458                    | China General Microbiological Culture Collection Center 3.3630                          | China General Microbiological Culture Collection Center     |
| <i>F. poae</i>      | <i>Fusarium poae</i> NF732                             | China General Microbiological Culture Collection Center 3.4601                          | China General Microbiological Culture Collection Center     |
| <i>V. dahliae</i>   | <i>Verticillium dahliae</i> V592                       | V592 from cotton originated in Xinjiang, China                                          | Gift from Drs. Huishan Guo (Jin et al., 2018) <sup>17</sup> |
| <i>M. robertsii</i> | <i>Metarhizium robertsii</i>                           | Agricultural Research Service Collection of Entomopathogenic Fungal Cultures ARSEF 2575 | Gift from Drs. Chengshu Wang                                |

  

| Strains           | Generation method | Relevant characteristics                     | Source/Reference                                                                                                                                   |
|-------------------|-------------------|----------------------------------------------|----------------------------------------------------------------------------------------------------------------------------------------------------|
| FG-WT-AmCyan      | pZD101            | pvma3-AmCyan transformant of PH-1            | Yuan et al., 2008 <sup>18</sup>                                                                                                                    |
| FG-WT-RFP         | JM135D            | pEF1-RFP transformant of PH-1                | This study                                                                                                                                         |
| FG-ΔFGSG_13879    | Split-marker PCR  | FGSG_13879 deletion mutant of PH-1           | This study                                                                                                                                         |
| FG-Δnrps5         | Split-marker PCR  | nrps5 deletion mutant of PH-1                | This study                                                                                                                                         |
| FG-Δfgm9          | Split-marker PCR  | fgm9 deletion mutant of PH-1                 | This study                                                                                                                                         |
| FG-Δnrps9         | Split-marker PCR  | nrps9 deletion mutant of PH-1                | Zhang et al., 2012 <sup>2</sup>                                                                                                                    |
| FG-Δfgm1          | Split-marker PCR  | fgm1 deletion mutant of PH-1                 | This study                                                                                                                                         |
| FG-Δfgm2          | Split-marker PCR  | fgm2 deletion mutant of PH-1                 | Zhang et al., 2012 <sup>2</sup>                                                                                                                    |
| FG-Δfgm3          | Split-marker PCR  | fgm3 deletion mutant of PH-1                 | This study                                                                                                                                         |
| FG-Δfgm4          | Split-marker PCR  | fgm4 deletion mutant of PH-1                 | This study                                                                                                                                         |
| FG-Δfgm4::fgm4    | Split-marker PCR  | FG-Δfgm4 complemented transformant           | This study                                                                                                                                         |
| FG-Δfgm5          | Split-marker PCR  | fgm5 deletion mutant of PH-1                 | Zhang et al., 2012 <sup>2</sup>                                                                                                                    |
| FG-Δfg3_54        | Split-marker PCR  | fg3_54 whole cluster deletion mutant of PH-1 | This study                                                                                                                                         |
| FG-ΔFGSG_10996    | Split-marker PCR  | FGSG_10996 deletion mutant of PH-1           | This study                                                                                                                                         |
| FG-Δfg3_54-RFP    | JM135D            | pEF1-RFP transformant of FG-Δfg3_54          | This study                                                                                                                                         |
| FG-Δfg3_54-Amcyan | Flu6              | pvma3-AmCyan transformant of FG-Δfg3_54      | This study                                                                                                                                         |
| FG-Δfgm4-RFP      | JM135D            | pEF1-RFP transformant of FG-Δfgm4            | This study                                                                                                                                         |
| FG-Δfgm5-Amcyan   | Flu6              | pvma3-AmCyan transformant of Δfgm5           | This study                                                                                                                                         |
| FG-WT-OE::fgm4    | WT-               | pEF1-FGM4 CDS transformant of PH-1           | This study                                                                                                                                         |
| FG-Δnrps5::fgm4   | JM109A            | pEF1-FGM4 CDS transformant of FG-Δnrps5      | This study                                                                                                                                         |
| FG-Δfgm9::fgm4    | JM109A            | pEF1-FGM4 CDS transformant of FG-Δfgm9       | This study                                                                                                                                         |
| FG-Δnrps9::fgm4   | JM109A            | pEF1-FGM4 CDS transformant of FG-Δnrps9      | This study                                                                                                                                         |
| FG-Δfgm1::fgm4    | JM109A            | pEF1-FGM4 CDS transformant of FG-Δfgm1       | This study                                                                                                                                         |
| FG-Δfgm2::fgm4    | JM109A            | pEF1-FGM4 CDS transformant of FG-Δfgm2       | This study                                                                                                                                         |
| FG-Δfgm3::fgm4    | JM109A            | pEF1-FGM4 CDS transformant of FG-Δfgm3       | This study                                                                                                                                         |
| FG-Δfgm5::fgm4    | JM109A            | pEF1-FGM4 CDS transformant of FG-Δfgm5       | This study                                                                                                                                         |
| FG-Δfg3_54::fgm4  | JM109A            | pEF1-FGM4 CDS transformant of FG-Δfg3_54     | This study                                                                                                                                         |
| FGM4-RFP          | JM65E             | pEF1-FGM4-mRFP transformant of PH-1          | This study                                                                                                                                         |
| fgm4-eGFP         | JM93              | pvma3-eGFP-FGM4 transformant of PH-1         | This study                                                                                                                                         |
| Foc TR4-eGFP      |                   | pvma3-eGFP transformant of Foc TR4           | Gift from Prof. Sijun Zheng, South China Agricultural University, College of Natural Resources and Environment. (Zhang et al., 2018) <sup>16</sup> |

Supplementary Table 2: Primers and plasmids used in this study.

## A. Primers used in mutants generation and verification

| Gene ID                  | Primer type             | Primer sequence                                    | Product length (bp) |
|--------------------------|-------------------------|----------------------------------------------------|---------------------|
| FGSG_13879               | Up-F                    | CGATGAGGAGAGAACGGAC                                | 1004                |
|                          | Up-R                    | TAGCCACGATTCGAAGCCGCGAGGGTGGGATCTTATTGAC           |                     |
|                          | Down-F                  | CGCATTGAATTGAAAAAGGAAGAGATATGGTCTGCGGATTGAGCCTATTG | 976                 |
|                          | Down-R                  | GCATTGTCGGAGAGCGTG                                 |                     |
|                          | IF                      | CACCCCATCATTACACCCGA                               | 554                 |
|                          | IR                      | CAGAGCCACCCGATACGTT                                |                     |
|                          | U                       | GTCATAAGATCCACCCCTC                                |                     |
| D                        | CAATAGGCTCAATCCGCAG     | 1854                                               |                     |
| FGSG_13878 <i>nrips5</i> | Up-F                    | CGGCACCTATTGACAACCAG                               | 1182                |
|                          | Up-R                    | TAGCCACGATTCGAAGCCGCTCTGGGCGAGATTATGACA            |                     |
|                          | Down-F                  | CGCATTGAATTGAAAAAGGAAGAGATATGGGTAATGATGTGTGTGTGTG  | 1294                |
|                          | Down-R                  | CCAGTGACATTGTGCGCAAG                               |                     |
|                          | IF                      | GCTCCTCTCCGACACGGTG                                | 651                 |
|                          | IR                      | ACATGATTGCCAGCGTGCT                                |                     |
|                          | U                       | TGTCATAATCTGCCCCAGAG                               |                     |
| D                        | CACACAACACACATCATTACC   | 4203                                               |                     |
| FGSG_10989 <i>fgm9</i>   | Up-F                    | TGAACGATGAAGCGAAAGGA                               | 916                 |
|                          | Up-R                    | TAGCCACGATTCGAAGCCGCGGTATTACAAGGATAAGTGATGC        |                     |
|                          | Down-F                  | CGCATTGAATTGAAAAAGGAAGAGATGACAGCCAGGATAGTGTAA      | 983                 |
|                          | Down-R                  | GGGTGATATGCAATGTCAGC                               |                     |
|                          | IF                      | CTCATACCCGAGCAAGTCG                                | 342                 |
|                          | IR                      | GGCGAGCAGGAATGTACCAG                               |                     |
|                          | U                       | GCATCACTTATCCTTGAATACCC                            |                     |
| D                        | TTAACTATCCTGGGCGTG      | 1151                                               |                     |
| FGSG_10991 <i>fgm1</i>   | Up-F                    | ACCATCAGTCTCTGGAGCG                                | 1012                |
|                          | Up-R                    | TAGCCACGATTCGAAGCCGCGTGGCGATTGGAAGTTATTG           |                     |
|                          | Down-F                  | CGCATTGAATTGAAAAAGGAAGAGATGGGCTCAAGTGCAGACTTCGT    | 1028                |
|                          | Down-R                  | TGCTTTCGTGAGTTATCGA                                |                     |
|                          | IF                      | TGTCCCAGGCGTAGTGGTTA                               | 540                 |
|                          | IR                      | CCTCCTCTGGCACTGTCTT                                |                     |
|                          | U                       | CAATAACTTCAATCGCCAAC                               |                     |
| D                        | ACGAAGTCTGCACCTGAGCC    | 1615                                               |                     |
| FGSG_10992 <i>fgm2</i>   | Up-F                    | GTTGATGTTGTTGCTGGG                                 | 836                 |
|                          | Up-R                    | TAGCCACGATTCGAAGCCGCGTTCGCGATGATTTGAAA             |                     |
|                          | Down-F                  | CGCATTGAATTGAAAAAGGAAGAGATGAAATGATTCAGACTGCCAGAT   | 998                 |
|                          | Down-R                  | ATCATCGCAGCCAACTCT                                 |                     |
|                          | IF                      | GCCCACGATTCAAACTCCA                                | 528                 |
|                          | IR                      | ATGTCGCTCAAGGACGTGTC                               |                     |
|                          | U                       | TTTCAAATCATCGCAGACC                                |                     |
| D                        | ATCTGGCAGTCTTGAATACATTT | 1152                                               |                     |
| FGSG_10993 <i>fgm3</i>   | Up-F                    | GGTCGTGCGATGATTTGAAA                               | 836                 |
|                          | Up-R                    | TAGCCACGATTCGAAGCCGCGTTCGATGTTGTTGCTGGG            |                     |
|                          | Down-F                  | CGCATTGAATTGAAAAAGGAAGAGATGGGAGAGACTTTTGTGTTTTG    | 1013                |
|                          | Down-R                  | TCAGCATGTAGTCCACGGAG                               |                     |
|                          | IF                      | CAATCAAGTGGTGACACCG                                | 525                 |
|                          | IR                      | CGTCTGCTTGGGATTCTCAC                               |                     |
|                          | U                       | CCCAGCAACACAATCAAC                                 |                     |
| D                        | CAAAACGACAAAGAGTCTCTCC  | 1480                                               |                     |
| FGSG_10994 <i>fgm4</i>   | Up-F                    | CATCCACGCTTTCATCATTG                               | 1030                |
|                          | Up-R                    | TAGCCACGATTCGAAGCCGCGATTGATGGTTACATACATCG          |                     |
|                          | Down-F                  | CGCATTGAATTGAAAAAGGAAGAGATGCTGCAAGGCATTGATCACA     | 988                 |
|                          | Down-R                  | ATCCTGCTTTTAGCGAGGG                                |                     |
|                          | IF                      | GCAAGGCCAGATGATGATCAA                              | 867                 |
|                          | IR                      | GCCACACAACGTCAGCGTCT                               |                     |
|                          | U                       | CGATGATGTAACCCAATCAATC                             |                     |
| D                        | TGTGAATCAATGCCTTGCA     | 1403                                               |                     |
| FGM4 probe               | ATGAATGGCTCTGCTGAACC    |                                                    |                     |
| D                        | CGCCGTAATTGTCCTTTGAA    | 340                                                |                     |
| FG3_54                   | Up-F                    | TCTTCGCCATTCAGTCCAG                                | 1030                |
|                          | Up-R                    | TAGCCACGATTCGAAGCCGCGACAGGAGTTGAAGACATTGG          |                     |
|                          | Down-F                  | CGCATTGAATTGAAAAAGGAAGAGATGAGAAGGTCAGAAGGAAAGGTAGA | 1081                |
|                          | Down-R                  | TCGCCGATCATTAAACGAGT                               |                     |
|                          | IF-1                    | GCTCCTCTCCGACACGGTG                                | 651                 |
|                          | IR-1                    | ACATGATTGCCAGCGTGCT                                |                     |
|                          | IF-2                    | GCAGGTCTCAAGCCAGTACG                               |                     |
| IR-2                     | TCCTGTGGCGAGTTGTAGCT    | 532                                                |                     |
| FGSG_10996               | Up-F                    | GATGTCGATGGAGGATTCAC                               | 1154                |
|                          | Up-R                    | TAGCCACGATTCGAAGCCGCTTTGAACGGTGAAGCCTAA            |                     |
|                          | Down-F                  | CGCATTGAATTGAAAAAGGAAGAGATGGAATTCGCTTGCACTTTTG     | 1136                |
|                          | Down-R                  | GCAATGGAGAAGAAGTAAGTG                              |                     |
|                          | IF                      | TGTTGTCTTCTGGTGATC                                 | 720                 |
|                          | IR                      | CTGTCCCTTGTAAACCGTC                                |                     |
|                          | U                       | TTAGGCTTACCCTTCAAA                                 |                     |
| D                        | CAAAAGTGAAGCGAAATTC     | 2053                                               |                     |
| Hygromycin               | HY                      | GATGTAGGAGGCGTGATATGTCCT                           | 315                 |
|                          | YG                      | GTATTGACCGATTCCTTGGGTCGAA                          |                     |
|                          | Hyg-F                   | GCGGCTTCGAATCGTGGCTA                               | 1596                |
|                          | Hyg-R                   | CATACTTCTCTTTTCAATTCAATGCG                         |                     |

## B. Primers used in RT-PCR

| Gene ID                               | Primer type              | Primer sequence             | Product length (bp) |
|---------------------------------------|--------------------------|-----------------------------|---------------------|
| <i>tubulin</i>                        | F                        | AGGTTGAGGACCAAGTGGC         | 153                 |
|                                       | R                        | CCTGGATAGAGGTGGAGTTTC       |                     |
| FGSG_13878 <i>nps5</i>                | F                        | CCACTGAGCCACCGTCGGGTC       | 141                 |
|                                       | R                        | GCCAGGGACATCGTGGCAGAAG      |                     |
| FGSG_10989 <i>fgm9</i>                | F (Supplementary Fig 7)  | GTCCTTGGTCTGCTGATGATGAGC    | 85                  |
|                                       | R (Supplementary Fig 7)  | CGGTAAACGGCACTGGAGGACTTCC   |                     |
|                                       | IF (Supplementary Fig 6) | CTCATCACCGGAGCAAGTCG        | 342                 |
|                                       | IR (Supplementary Fig 6) | GGCGAGCAGGAATGTACCAG        |                     |
| FGSG_10990 <i>nps9</i>                | F                        | CAACGACACGGGAAGTGGGC        | 417                 |
|                                       | R                        | CAGGACTTTGGGACACCGCC        |                     |
| FGSG_10991 <i>fgm1</i>                | F                        | CTTGATGCCACACCGACGAGATTC    | 81                  |
|                                       | R                        | ACCTAGACACAGTCTTGCGCCGTAACC |                     |
| FGSG_10992 <i>fgm2</i>                | F                        | GCCCACGATTCCAAACTCCA        | 528                 |
|                                       | R                        | ATGTCGGCTCAAGGACGTGTC       |                     |
| FGSG_10993 <i>fgm3</i>                | F                        | TTCTCCACTGTATTATAGT         | 375                 |
|                                       | R                        | GCAGCTAGCTACGAGTTGAC        |                     |
| FGSG_10994 <i>fgm4</i>                | F                        | TGACATCGCCAAATGACACGACACG   | 248                 |
|                                       | R                        | ATCGGCCCTTCTCGAGTA          |                     |
| FGSG_10995 <i>fgm5</i>                | F                        | GGTCAATCCTCGCCGTCGTCTT      | 170                 |
|                                       | R                        | CGAGCCTGATCGGTTGCCAAT       |                     |
| <i>FgLaeA</i>                         | F                        | ATTTGAGAAGTGGCGACAGC        | 381                 |
|                                       | R                        | TGCCCTGAATTTGTCTCTG         |                     |
| FGSG_10980                            | F                        | CGTTCGTATGGCTCAAGTCC        | 426                 |
|                                       | R                        | CGACCAAGAAGCATCTGGAA        |                     |
| TRIAE_CS42_1AL_TGACv1_001844_AA003575 | F                        | GTACGAGGAAGAGGAAGAC         | 192                 |
|                                       | R                        | CCTACATACGAACGCAGTA         |                     |
| TRIAE_CS42_1AS_TGACv1_019979_AA007356 | F                        | GAAATGTCCCTTCTCTCTG         | 170                 |
|                                       | R                        | GTTCTCTTATCTTATGGTATCG      |                     |
| TRIAE_CS42_1AS_TGACv1_020602_AA007866 | F                        | CAAGGAAGTAAGAAGATAGCATA     | 157                 |
|                                       | R                        | TCACACAACAAAGAACTAGG        |                     |
| TRIAE_CS42_1BL_TGACv1_030579_AA009469 | F                        | CAAGTGCCTCTGGTGAC           | 167                 |
|                                       | R                        | ACTGGTAGTTGACGGTGAG         |                     |
| TRIAE_CS42_4DL_TGACv1_344303_AA114596 | F                        | TTCCACTCTGTTCTACCTAC        | 102                 |
|                                       | R                        | TCTTCTTCAGTTCTTCATTATC      |                     |
| TRIAE_CS42_5BL_TGACv1_404755_AA131005 | F                        | AGACTTGGAGTGGCATAAC         | 200                 |
|                                       | R                        | AGAGCATTGACGAGAGATAA        |                     |
| TRIAE_CS42_5BL_TGACv1_405950_AA133810 | F                        | CGCAATGATGCTCTGTATC         | 159                 |
|                                       | R                        | TCCTCCTGGTAGTTGTTG          |                     |
| TRIAE_CS42_5DL_TGACv1_433301_AA140871 | F                        | TCTTCTGAGCACCAACTAA         | 100                 |
|                                       | R                        | ATGGCTTCTCTGTCAAT           |                     |
| TRIAE_CS42_7AL_TGACv1_556962_AA177423 | F                        | CGTGTTCCTTCCAGTTC           | 117                 |
|                                       | R                        | AATGACCAGGTGTTGAGT          |                     |
| TRIAE_CS42_U_TGACv1_641050_AA2083310  | F                        | TTATACCATAGGCCACTCAA        | 105                 |
|                                       | R                        | AGTCATATCTCATATCTCAGTTGT    |                     |
| TRIAE_CS42_U_TGACv1_641586_AA2098860  | F                        | GTGGATGGACAGACAGAG          | 100                 |
|                                       | R                        | CCTAAGTACGAGTACGAACA        |                     |
| TRIAE_CS42_1BL_TGACv1_030423_AA009030 | F                        | CACGCTCATAGTTACCAT          | 106                 |
|                                       | R                        | CAGCCAGTAGAAGTAGTC          |                     |
| TRIAE_CS42_3DL_TGACv1_252407_AA088991 | F                        | GATGACACCTACGCTGCTA         | 157                 |
|                                       | R                        | CGGATGAGACGAAGAGATGA        |                     |
| TRIAE_CS42_4BS_TGACv1_328762_AA109325 | F                        | GACACCCTTCTCTCAAGT          | 135                 |
|                                       | R                        | TCCGACCACCATATCCAT          |                     |
| TRIAE_CS42_6AL_TGACv1_473004_AA152799 | F                        | ACATCCTTGGCTTCACTT          | 101                 |
|                                       | R                        | CTCCTTCACTCTTCCAT           |                     |
| TRIAE_CS42_7BL_TGACv1_576942_AA186063 | F                        | CTGTGCTTGTGCTAATGT          | 200                 |
|                                       | R                        | CTCTCCGCCACTTGTGG           |                     |
| TRIAE_CS42_3DS_TGACv1_272777_AA092521 | F                        | AAGGAAGGGTATGTTGTT          | 134                 |
|                                       | R                        | CAGCGTTAGCAATGGTAAT         |                     |
| TRIAE_CS42_4BL_TGACv1_321044_AA105424 | F                        | GTTGATTACCGGAAGATTAGT       | 112                 |
|                                       | R                        | GGCTTACAGACATACAATGG        |                     |
| TRIAE_CS42_5DL_TGACv1_436942_AA146413 | F                        | GCATAAAGAATAAGCCGAGAT       | 110                 |
|                                       | R                        | CCTACAATGATAGTACAACCTACA    |                     |
| TRIAE_CS42_1DS_TGACv1_082348_AA026447 | F                        | AACAAGCGATGGAGAATG          | 156                 |
|                                       | R                        | GATGGATACACTAATGAATACGA     |                     |
| TRIAE_CS42_5AL_TGACv1_376703_AA124007 | F                        | TAGGAGTTGCTAGAGGATTG        | 168                 |
|                                       | R                        | TTGTCAGGATTCGGCTAA          |                     |
| TRIAE_CS42_5BL_TGACv1_405555_AA133018 | F                        | CCGATGCTGAGACTACTT          | 157                 |
|                                       | R                        | TTCTTCTTCACTTCTTCCA         |                     |
| TRIAE_CS42_6BS_TGACv1_513389_AA163997 | F                        | CATCCATCTTCGCATCATAT        | 155                 |
|                                       | R                        | GCTGGTTGGTTACATATCAT        |                     |
| TRIAE_CS42_6DL_TGACv1_526658_AA168917 | F                        | GGTGCTGATGGTACTGTA          | 184                 |
|                                       | R                        | GTTGGACTGGAGGATGAA          |                     |
| TRIAE_CS42_6DS_TGACv1_543310_AA173836 | F                        | CTCAACACACCGTCAAC           | 166                 |
|                                       | R                        | TATGGACTAACTCACTGGATG       |                     |
| TRIAE_CS42_7BL_TGACv1_577584_AA187903 | F                        | GGATGCTTGTGGTGATG           | 124                 |
|                                       | R                        | TTCTGGTCTTCTCTTCT           |                     |
| TRIAE_CS42_U_TGACv1_641607_AA2099310  | F                        | TATCCGTCGCTCCTAAGT          | 158                 |
|                                       | R                        | CATAGTGGTTCGCTGGTA          |                     |

### C. Plasmids used in this study

| Use                                                          | Plasmid name | Relevant characteristics                                       | Plasmid backbone | Primers                                                  | Template                                | Cloning strategy |
|--------------------------------------------------------------|--------------|----------------------------------------------------------------|------------------|----------------------------------------------------------|-----------------------------------------|------------------|
| Generation fluorescence tagged <i>F. graminearum</i> strains | pZD101       | p <sub>vma3</sub> -AmCyan, Hyg <sup>R</sup> -A <sup>R</sup>    |                  | Previously generated in Yuan et al., 2008 <sup>18</sup>  |                                         |                  |
|                                                              | Flu19        | pEF1-insertion site-mRFP, Hyg <sup>R</sup> -A <sup>R</sup>     | pZD101           | PC1/PC2                                                  | Genomic DNA of PH-1                     | HindIII - Spe I  |
|                                                              | Flu6         | p <sub>vma3</sub> -AmCyan, Neo <sup>R</sup> -A <sup>R</sup>    | pZD101           |                                                          |                                         |                  |
|                                                              | JM135D       | pEF1-RFP, Neo <sup>R</sup> -A <sup>R</sup>                     | Flu6             |                                                          | Flu19                                   | HindIII - EcoR I |
| <i>fgm4</i> Overexpression                                   | JM82         | pMD19-FGM4 (cDNA, 834 bp), A <sup>R</sup>                      | pMD19-T          | PC3/PC4                                                  | cDNA of PH-1 infected wheat coleoptiles |                  |
|                                                              | JM82A        | pMD19-FGM4 (cDNA), A <sup>R</sup>                              | pMD19-T          | PC5/PC6                                                  | JM82                                    | Spe I - Nde I    |
|                                                              | JM65         | pEF1-FGM4, Hyg <sup>R</sup> -A <sup>R</sup>                    | pZD101           |                                                          | JM82                                    | Spe I - Nde I    |
|                                                              | JM109        | pEF1-FGM4, Neo <sup>R</sup> -A <sup>R</sup>                    | JM135D           |                                                          | JM82                                    | Spe I - Nde I    |
| <i>fgm4</i> complement                                       | JM45         | pMD19-Neo, A <sup>R</sup>                                      | pMD19-T          | PC7/PC8                                                  | Flu6                                    | EcoR I - Not I   |
|                                                              | JM70         | pMD19-Native pro-FGM4 (gDNA), Neo <sup>R</sup> -A <sup>R</sup> | JM45             | PC9/PC10                                                 | Genomic DNA of PH-1                     | Pst I - Not I    |
| Subcellular localization                                     | JM65E        | pEF1-FGM4-mRFP, Hyg <sup>R</sup> -A <sup>R</sup>               | Flu19            | PC5/PC11                                                 | JM82                                    | Spe I - Nde I    |
|                                                              | W33          | ProLAT52:eGFP                                                  |                  | Previously generated in Zhang et al., 2008 <sup>19</sup> |                                         |                  |
|                                                              | JM89A        | pMD19-eGFP (without TAA)                                       | pMD19-T          | PC12/PC13                                                | W33                                     | Spe I - Kpn I    |
|                                                              | JM92         | p <sub>vma3</sub> -eGFP, Hyg <sup>R</sup> -A <sup>R</sup>      | pZD101           |                                                          | JM82                                    | Spe I - Kpn I    |
|                                                              | JM93         | p <sub>vma3</sub> -eGFP-FGM4, Hyg <sup>R</sup> -A <sup>R</sup> | JM92             |                                                          | JM82                                    | Kpn I - Nde I    |
| FgLaeA OX                                                    | JM79A        | pEF1-FgLaeA, Hyg <sup>R</sup> -A <sup>R</sup>                  | JM65             | PC14/PC15                                                | cDNA of PH-1                            | Spe I - Xho I    |
| Yeast two-hybrid                                             | JM80A        | pMD19-FgLaeA (cDNA), A <sup>R</sup>                            | pMD19-T          | PC16/PC17                                                | JM79A                                   | BamH I - Not I   |
|                                                              | JM95         | BK-FgLaeA                                                      | pGBKT7           |                                                          | JM80A                                   | BamH I - Not I   |
|                                                              | JM82C        | pMD19-FGM4 (cDNA), A <sup>R</sup>                              | pMD19-T          | PC3/PC18                                                 | JM82                                    | EcoR I - BamH I  |
|                                                              | JM97         | AD-FGM4                                                        | pGADT7           |                                                          | JM82C                                   | EcoR I - BamH I  |
|                                                              | JM86         | BK-FGM4                                                        | pGBKT7           |                                                          | JM82                                    | EcoR I - Not I   |
|                                                              | JM98         | BK-FGM4 (1-245)                                                | pGBKT7           | PC3/PC19                                                 | JM82                                    | EcoR I - Not I   |
|                                                              | JM99         | BK-FGM4 (1-212)                                                | pGBKT7           | PC3/PC20                                                 | JM82                                    | EcoR I - Not I   |
| Southern blot probes                                         | JM57         | <i>FGM9</i> probe (Spe I - EcoR I)                             | pMD19-T          | <i>FGM9</i> -IF/ <i>FGM9</i> -IR                         | Genomic DNA of PH-1                     |                  |
|                                                              | JM58         | <i>FGM1</i> probe (Spe I - EcoR I)                             | pMD19-T          | <i>FGM1</i> -IF/ <i>FGM1</i> -IR                         | Genomic DNA of PH-1                     |                  |
|                                                              | JM59         | <i>FGM3</i> probe (Nhe I - Kpn I)                              | pMD19-T          | <i>FGM3</i> -IF/ <i>FGM3</i> -IR                         | Genomic DNA of PH-1                     |                  |
|                                                              | JM60         | <i>FGM4</i> probe (Spe I - EcoR V)                             | pMD19-T          | PC21/PC22                                                | Genomic DNA of PH-1                     |                  |
|                                                              | JM56         | <i>FgNRPS5</i> probe (Spe I - EcoR I)                          | pMD19-T          | PC23/PC24                                                | Genomic DNA of PH-1                     |                  |



## D. Primers used for plasmids construction

| Plasmids | Primer ID | Sequence                                   | Product length (bp) | Enzyme sites |
|----------|-----------|--------------------------------------------|---------------------|--------------|
| Flu19    | PC1       | CC <u>AAGCTT</u> GTGCAAGCATCCATGATTGA      | 1045                | HindIII      |
|          | PC2       | GG <u>ACTAGT</u> TTTGACGGTTGTGGATGGTT      |                     | Spe I        |
| JM82     | PC3       | GT <u>GAATTC</u> ATGGACTCGTTGCTTAATTCAA    | 842                 | EcoR I       |
|          | PC4       | TCAGCAAACCTTGAGCTCCAT                      |                     |              |
| JM82A    | PC5       | GG <u>ACTAGT</u> ATGGACTCGTTGCTTAATTCAA    | 848                 | Spe I        |
|          | PC6       | <u>CATATG</u> TCAGCAAACCTTGAGCTCCAT        |                     | Nde I        |
| JM45     | PC7       | CG <u>GAATTC</u> CGACGAATAGGAACTTCGGA      | 2113                | EcoR I       |
|          | PC8       | TT <u>GCGGCCGC</u> ATTTCCATTGCGCCATTCAGG   |                     | Not I        |
| JM70     | PC9       | AA <u>CTGCAG</u> AGTGCAACCTGACACAGCCAT     | 2401                | Pst I        |
|          | PC10      | TT <u>GCGGCCGC</u> ACCAACGGAAATCGGCATTT    |                     | Not I        |
| JM65E    | PC5       | see above                                  | 847                 | Spe I        |
|          | PC11      | CC <u>CATATG</u> GCAAACCTTGAGCTCCATGTT     |                     | Nde I        |
| JM89A    | PC12      | CC <u>ACTAGT</u> ATGGTGAGCAAGGGCGAGGA      | 733                 | Spe I        |
|          | PC13      | GT <u>GGTACC</u> CTTGACAGCTCGTCCATGCCG     |                     | Kpn I        |
| JM79A    | PC14      | G <u>ACTAGT</u> ATGGCTGTGATGCCTCCACCA      | 967                 | Spe I        |
|          | PC15      | CCG <u>CTCGAG</u> TTACTGTGGCGGGCCAGGC      |                     | Xho I        |
| JM80A    | PC16      | G <u>GATCC</u> TCATGGCTGTGATGCCTCCACCA     | 969                 | BamH I       |
|          | PC17      | G <u>GCGGCCGC</u> TTACTGTGGCGGGCCAGGC      |                     | Not I        |
| JM82C    | PC3       | see above                                  | 849                 | EcoR I       |
|          | PC18      | G <u>GATCC</u> TCAGCAAACCTTGAGCTCCAT       |                     | BamH I       |
| JM98     | PC3       | see above                                  | 756                 | EcoR I       |
|          | PC19      | TT <u>GCGGCCGC</u> TTAGGAATATACATCGGCCCTT  |                     | Not I        |
| JM99     | PC3       | see above                                  | 657                 | EcoR I       |
|          | PC20      | TT <u>GCGGCCGC</u> TTACTCGTTGACGTTGGCACCGT |                     | Not I        |
| JM60     | PC21      | GCCTGCTATGATTCCAACCT                       | 558                 |              |
|          | PC22      | ACACGACACGTTATGCCATC                       |                     |              |
| JM56     | PC23      | TGCATAGCGCAGAGCAAGTG                       | 390                 |              |
|          | PC24      | ACCGGCACCATGACACAGAC                       |                     |              |

Supplementary Table 3: RNA-seq expression data of *F. graminearum* secondary metabolic genes from *fgm4* overexpressing strains growing in YEPD for 3 days.

**A. Expression data of *fg3\_54* and flanking genes**

| FGSG ID    | Gene          | Average FPKM value |               |             |                            | Average Reads count |               |             |                            |
|------------|---------------|--------------------|---------------|-------------|----------------------------|---------------------|---------------|-------------|----------------------------|
|            |               | WT                 | $\Delta fgm4$ | WT-OE::FGM4 | $\Delta fgm3_54$ -OE::FGM4 | WT                  | $\Delta fgm4$ | WT-OE::FGM4 | $\Delta fgm3_54$ -OE::FGM4 |
| FGSG_11000 |               | 0.0                | 0.0           | 0.2         | 0.1                        | 0                   | 0             | 1           | 0                          |
| FGSG_10999 |               | 0.0                | 0.0           | 0.0         | 0.0                        | 0                   | 0             | 0           | 0                          |
| FGSG_10998 |               | 11.8               | 4.1           | 3.2         | 3.2                        | 226                 | 79            | 62          | 62                         |
| FGSG_10997 |               | 3.1                | 2.1           | 6.4         | 3.3                        | 37                  | 24            | 74          | 37                         |
| FGSG_10996 |               | 21.0               | 37.7          | 35.2        | 47.2                       | 603                 | 1069          | 987         | 1341                       |
| FGSG_10995 | <i>fgm5</i>   | 1.1                | 49.2          | 21.9        | 0.0                        | 66                  | 2975          | 1356        | 0                          |
| FGSG_10994 | <i>fgm4</i>   | 2.5                | 0.0           | 1452.3      | 735.5                      | 22                  | 0             | 12888       | 6474                       |
| FGSG_10993 | <i>fgm3</i>   | 34.1               | 173.7         | 3038.3      | 0.2                        | 569                 | 2880          | 47897       | 3                          |
| FGSG_10992 | <i>fgm2</i>   | 9.3                | 56.9          | 675.0       | 0.0                        | 124                 | 732           | 8360        | 0                          |
| FGSG_10991 | <i>fgm1</i>   | 0.6                | 10.5          | 1369.6      | 0.1                        | 12                  | 215           | 27232       | 2                          |
| FGSG_10990 | <i>nrips9</i> | 0.7                | 0.6           | 1905.4      | 0.1                        | 25                  | 21            | 64871       | 3                          |
| FGSG_10989 | <i>fgm9</i>   | 1.2                | 0.5           | 585.5       | 0.1                        | 14                  | 6             | 6930        | 2                          |
| FGSG_13878 | <i>nrips5</i> | 0.2                | 0.1           | 25.2        | 0.0                        | 113                 | 54            | 12883       | 0                          |
| FGSG_13879 |               | 0.0                | 0.0           | 0.0         | 0.0                        | 1                   | 0             | 1           | 0                          |
| FGSG_10987 |               | 0.2                | 0.3           | 0.6         | 0.7                        | 3                   | 4             | 10          | 11                         |
| FGSG_10986 |               | 0.6                | 4.6           | 1.7         | 9.5                        | 15                  | 118           | 42          | 237                        |
| FGSG_10985 |               | 0.7                | 1.5           | 1.3         | 1.3                        | 8                   | 18            | 14          | 15                         |
| FGSG_10984 |               | 0.2                | 0.5           | 0.4         | 0.2                        | 4                   | 10            | 10          | 5                          |
| FGSG_10983 |               | 12.5               | 11.7          | 33.1        | 16.2                       | 184                 | 168           | 472         | 231                        |
| FGSG_10982 |               | 2.5                | 1.4           | 1.7         | 1.9                        | 78                  | 45            | 54          | 59                         |
| FGSG_13880 |               | 65.8               | 120.1         | 181.2       | 157.0                      | 747                 | 1330          | 1985        | 1732                       |
| FGSG_13881 |               | 5.5                | 6.0           | 9.7         | 9.4                        | 124                 | 131           | 209         | 201                        |
| FGSG_10980 |               | 2.2                | 3.1           | 2.9         | 2.1                        | 41                  | 56            | 51          | 37                         |

**B. Expression data of *F. graminearum* PKSs and NRPSs**

| FGSG ID    | Gene            | Average FPKM value |               |             |                            | Average Reads count |               |             |                            |
|------------|-----------------|--------------------|---------------|-------------|----------------------------|---------------------|---------------|-------------|----------------------------|
|            |                 | WT                 | $\Delta fgm4$ | WT-OE::FGM4 | $\Delta fgm3_54$ -OE::FGM4 | WT                  | $\Delta fgm4$ | WT-OE::FGM4 | $\Delta fgm3_54$ -OE::FGM4 |
| FGSG_10548 | <i>FgPKS1</i>   | 0.0                | 0.0           | 0.0         | 0.0                        | 5                   | 5             | 6           | 3                          |
| FGSG_04694 | <i>FgPKS2</i>   | 0.3                | 0.1           | 0.1         | 0.0                        | 34                  | 9             | 13          | 5                          |
| FGSG_09182 | <i>FgPKS3</i>   | 0.1                | 0.3           | 0.3         | 0.3                        | 9                   | 24            | 29          | 24                         |
| FGSG_12126 | <i>FgPKS4</i>   | 0.1                | 0.1           | 0.2         | 0.1                        | 7                   | 7             | 18          | 6                          |
| FGSG_05794 | <i>FgPKS5</i>   | 0.2                | 0.2           | 0.2         | 0.2                        | 29                  | 25            | 28          | 28                         |
| FGSG_08208 | <i>FgPKS6</i>   | 0.1                | 0.2           | 0.5         | 0.1                        | 8                   | 20            | 57          | 16                         |
| FGSG_08795 | <i>FgPKS7</i>   | 1.8                | 1.7           | 1.1         | 1.2                        | 194                 | 177           | 117         | 126                        |
| FGSG_03340 | <i>FgPKS8</i>   | 3.5                | 1.8           | 5.0         | 1.6                        | 402                 | 213           | 573         | 189                        |
| FGSG_10464 | <i>FgPKS9</i>   | 0.1                | 0.2           | 0.6         | 0.4                        | 12                  | 21            | 67          | 44                         |
| FGSG_07798 | <i>FgPKS10</i>  | 0.2                | 0.3           | 2.2         | 0.2                        | 39                  | 44            | 386         | 27                         |
| FGSG_01790 | <i>FgPKS11</i>  | 0.0                | 0.0           | 0.0         | 0.0                        | 0                   | 1             | 0           | 0                          |
| FGSG_02324 | <i>FgPKS12</i>  | 0.2                | 0.1           | 0.1         | 0.1                        | 16                  | 5             | 8           | 9                          |
| FGSG_02395 | <i>FgPKS13</i>  | 0.0                | 0.0           | 0.0         | 0.0                        | 1                   | 1             | 1           | 1                          |
| FGSG_03964 | <i>FgPKS14</i>  | 0.1                | 0.0           | 0.0         | 0.0                        | 10                  | 3             | 3           | 1                          |
| FGSG_04588 | <i>FgPKS15</i>  | 0.0                | 0.1           | 3.3         | 1.0                        | 2                   | 8             | 324         | 95                         |
| FGSG_11026 | <i>FgNRPS1</i>  | 0.0                | 0.0           | 0.0         | 0.0                        | 1                   | 0             | 0           | 2                          |
| FGSG_05372 | <i>FgNRPS2</i>  | 7.5                | 5.6           | 7.9         | 3.5                        | 1733                | 1253          | 1756        | 774                        |
| FGSG_10523 | <i>FgNRPS3</i>  | 2.2                | 1.3           | 2.3         | 1.2                        | 256                 | 146           | 265         | 136                        |
| FGSG_02315 | <i>FgNRPS4</i>  | 22.0               | 8.5           | 6.5         | 9.0                        | 7746                | 2973          | 2283        | 3151                       |
| FGSG_13878 | <i>FgNRPS5</i>  | 0.2                | 0.1           | 25.2        | 0.0                        | 113                 | 54            | 12883       | 0                          |
| FGSG_03747 | <i>FgNRPS6</i>  | 2.4                | 1.2           | 2.7         | 1.7                        | 222                 | 110           | 249         | 155                        |
| FGSG_08209 | <i>FgNRPS7</i>  | 0.5                | 2.6           | 20.6        | 2.4                        | 109                 | 523           | 4186        | 475                        |
| FGSG_11659 | <i>FgNRPS8</i>  | 0.7                | 1.0           | 0.3         | 0.2                        | 142                 | 213           | 52          | 35                         |
| FGSG_10990 | <i>FgNRPS9</i>  | 0.7                | 0.6           | 1905.4      | 0.1                        | 25                  | 21            | 64871       | 3                          |
| FGSG_06507 | <i>FgNRPS10</i> | 10.1               | 10.8          | 5.7         | 7.7                        | 597                 | 637           | 336         | 457                        |
| FGSG_03245 | <i>FgNRPS11</i> | 0.1                | 0.3           | 0.1         | 0.2                        | 3                   | 12            | 6           | 8                          |
| FGSG_11294 | <i>FgNRPS12</i> | 0.1                | 0.0           | 0.1         | 0.0                        | 5                   | 2             | 3           | 1                          |
| FGSG_13153 | <i>FgNRPS13</i> | 0.5                | 0.1           | 0.4         | 0.1                        | 22                  | 5             | 17          | 5                          |
| FGSG_11395 | <i>FgNRPS14</i> | 0.0                | 0.0           | 0.0         | 0.0                        | 1                   | 1             | 2           | 0                          |
| FGSG_02394 | <i>FgNRPS15</i> | 0.0                | 0.0           | 0.0         | 0.0                        | 0                   | 1             | 0           | 0                          |
| FGSG_01680 | <i>FgNRPS16</i> | 0.1                | 0.0           | 0.1         | 0.2                        | 8                   | 4             | 7           | 11                         |
| FGSG_10702 | <i>FgNRPS17</i> | 0.0                | 0.0           | 0.0         | 0.0                        | 0                   | 0             | 0           | 0                          |
| FGSG_13783 | <i>FgNRPS18</i> | 0.0                | 0.0           | 0.0         | 0.0                        | 0                   | 0             | 0           | 0                          |
| FGSG_11989 | <i>FgNRPS19</i> | 0.0                | 0.2           | 0.2         | 0.1                        | 1                   | 10            | 9           | 7                          |
| FGSG_03066 | <i>DTC1</i>     | 14.1               | 32.8          | 5.5         | 7.3                        | 332                 | 756           | 126         | 163                        |
| FGSG_07673 | <i>STC1</i>     | 768.0              | 1516.0        | 1628.1      | 976.6                      | 3375                | 6688          | 6725        | 4201                       |
| FGSG_00491 | <i>STC2</i>     | 1.1                | 1.5           | 1.7         | 1.3                        | 11                  | 14            | 16          | 13                         |
| FGSG_03494 | <i>STC4</i>     | 10.1               | 5.3           | 13.4        | 8.7                        | 136                 | 69            | 172         | 113                        |
| FGSG_08181 | <i>STC5</i>     | 0.0                | 0.0           | 0.0         | 0.0                        | 0                   | 0             | 1           | 0                          |
| FGSG_11327 | <i>STC6</i>     | 0.0                | 0.0           | 0.2         | 0.0                        | 0                   | 0             | 2           | 0                          |
| FGSG_10397 | <i>STC9</i>     | 0.0                | 0.0           | 0.0         | 0.0                        | 0                   | 0             | 1           | 0                          |

**C. Expression data of TRI cluster involved in DON production**

| FGSG NO.   | Gene          | Average FPKM value |               |             |                            | Average Reads count |               |             |                            |
|------------|---------------|--------------------|---------------|-------------|----------------------------|---------------------|---------------|-------------|----------------------------|
|            |               | WT                 | $\Delta fgm4$ | WT-OE::FGM4 | $\Delta fgm3_54$ -OE::FGM4 | WT                  | $\Delta fgm4$ | WT-OE::FGM4 | $\Delta fgm3_54$ -OE::FGM4 |
| FGSG_00070 | <i>TRI6</i>   | 0.3                | 0.5           | 0.8         | 0.8                        | 6                   | 9             | 16          | 15                         |
| FGSG_00071 | <i>TRI1</i>   | 3.0                | 1.9           | 2.2         | 2.3                        | 76                  | 48            | 54          | 60                         |
| FGSG_03532 | <i>TRI8</i>   | 3.9                | 2.2           | 2.4         | 2.8                        | 66                  | 36            | 40          | 46                         |
| FGSG_03533 | <i>TRI7</i>   | 0.2                | 0.1           | 0.0         | 0.1                        | 1                   | 0             | 0           | 0                          |
| FGSG_03534 | <i>TRI3</i>   | 0.0                | 0.0           | 0.1         | 0.1                        | 0                   | 0             | 1           | 2                          |
| FGSG_03535 | <i>TRI4</i>   | 0.0                | 0.2           | 0.0         | 0.3                        | 0                   | 4             | 0           | 7                          |
| FGSG_03536 | <i>TRI6</i>   | 0.5                | 0.3           | 0.2         | 0.2                        | 4                   | 2             | 2           | 2                          |
| FGSG_03537 | <i>TRI5</i>   | 0.0                | 0.0           | 0.1         | 0.3                        | 1                   | 0             | 1           | 5                          |
| FGSG_03538 | <i>TRI10</i>  | 1.5                | 0.6           | 0.3         | 0.6                        | 25                  | 10            | 4           | 10                         |
| FGSG_03539 | <i>TRI9</i>   | 1.3                | 0.7           | 0.9         | 0.7                        | 8                   | 4             | 5           | 4                          |
| FGSG_03540 | <i>TRI11</i>  | 0.1                | 0.0           | 0.0         | 0.1                        | 1                   | 0             | 0           | 1                          |
| FGSG_03541 | <i>TRI2</i>   | 1.0                | 0.8           | 1.3         | 0.9                        | 24                  | 18            | 31          | 22                         |
| FGSG_03542 | <i>TRI13</i>  | 2.5                | 0.0           | 0.2         | 0.2                        | 4                   | 0             | 0           | 0                          |
| FGSG_03543 | <i>TRI14</i>  | 0.6                | 0.2           | 0.4         | 0.3                        | 9                   | 3             | 5           | 5                          |
| FGSG_07896 | <i>TRI101</i> | 37.4               | 41.5          | 25.6        | 50.7                       | 709                 | 802           | 487         | 980                        |

Supplementary Table 4: Accession numbers

| Gene           | Species                                              | Gene NO.                | Annotation                                                      | GenBank accession NO. |
|----------------|------------------------------------------------------|-------------------------|-----------------------------------------------------------------|-----------------------|
| <i>Fgnrps5</i> |                                                      | FGSG_13879              | Probable tyrocidine synthetase                                  | XM_011327081.1        |
| <i>fgm9</i>    |                                                      | FGSG_13878 (FGSG_17487) | Related to non-ribosomal peptide synthetase                     | XM_011327080.1        |
| <i>Fgnrps9</i> |                                                      | FGSG_10989              | Conserved hypothetical protein                                  | XM_011327079.1        |
| <i>fgm1</i>    |                                                      | FGSG_10990              | Related to AM-toxin synthetase (AMT)                            | XM_011327078.1        |
| <i>fgm2</i>    |                                                      | FGSG_10991              | Related to benzoate 4-monoxygenase cytochrome P450              | XM_011327077.1        |
| <i>fgm3</i>    |                                                      | FGSG_10992              | Related to polysaccharide deacetylase                           | XM_011327076.1        |
| <i>fgm4</i>    |                                                      | FGSG_10993              | Related to selenocysteine lyase                                 | XM_011327075.1        |
| <i>fgm5</i>    |                                                      | FGSG_10994              | Conserved hypothetical protein                                  | XM_011327074.1        |
|                |                                                      | FGSG_10995              | Related to multidrug resistance protein                         | XM_011327073.1        |
|                |                                                      | FGSG_10996              | Conserved hypothetical protein                                  | XM_011327072.1        |
| <i>Tubulin</i> |                                                      | FGSG_09530              | Beta-tubulin                                                    | XM_011329885.1        |
| <i>FgLaEA</i>  |                                                      | FGSG_00657 (FGSG_15765) | Conserved hypothetical protein                                  | XM_011318048.1        |
| <i>RPB2</i>    | <i>F. fujikuroi</i> IMI 58289                        | FFUJ_07996              | Probable DNA-dependent RNA polymerase II RPB140 (RPE HF679027.1 |                       |
| <i>RPB2</i>    | <i>F. verticilloides</i> 7600                        | FVEG_09286              | DNA-directed RNA polymerase II subunit RPB2                     | DS022253.1            |
| <i>RPB2</i>    | <i>F. temperatum</i> CMWF389                         |                         |                                                                 | LJGR01000004.1        |
| <i>RPB2</i>    | <i>F. circinatum</i> strain GL1327                   |                         |                                                                 | JRVE01000005.1        |
| <i>RPB2</i>    | <i>F. agapanthi</i> NRRL 54464                       |                         |                                                                 | LTDI01000291.1        |
| <i>RPB2</i>    | <i>F. oxysporum</i> Fo5176                           | FOXb_01326              | Hypothetical protein                                            | AFQF01000478.1        |
| <i>RPB2</i>    | <i>F. oxysporum</i> f. sp. conglutinans race 2       | FOPG_06891              | DNA-directed RNA polymerase II subunit RPB2                     | JH658835.1            |
| <i>RPB2</i>    | <i>F. oxysporum</i> f. sp. vasinfectum 25433         | FOTG_10105              | DNA-directed RNA polymerase II subunit RPB2                     | JH657942.1            |
| <i>RPB2</i>    | <i>F. oxysporum</i> f. sp. pisi HDV247               | FQVG_06900              | DNA-directed RNA polymerase II subunit RPB2                     | JH650971.1            |
| <i>RPB2</i>    | <i>F. oxysporum</i> f. sp. raphani 54005             | FOQG_05936              | DNA-directed RNA polymerase II subunit RPB2                     | JH658371.1            |
| <i>RPB2</i>    | <i>F. oxysporum</i> f. sp. cubense tropical race 4   | FOIG_08965              | DNA-directed RNA polymerase II subunit RPB2                     | JH658285.1            |
| <i>RPB2</i>    | <i>F. oxysporum</i> FOSC 3-a                         | FQYG_08835              | DNA-directed RNA polymerase II subunit RPB2                     | JH717843.1            |
| <i>RPB2</i>    | <i>F. oxysporum</i> f. sp. melonis 26406             | FOMG_07427              | DNA-directed RNA polymerase II subunit RPB2                     | JH659332.1            |
| <i>RPB2</i>    | <i>F. oxysporum</i> f. sp. lycopersici 4287          | FOXG_10639              | DNA-directed RNA polymerase II subunit RPB2                     | CM000595.1            |
| <i>RPB2</i>    | <i>F. oxysporum</i> Fo47                             | FQZG_10131              | DNA-directed RNA polymerase II subunit RPB2                     | JH717901.1            |
| <i>RPB2</i>    | <i>F. oxysporum</i> f. sp. lycopersici MN25          | FOWG_14904              | DNA-directed RNA polymerase II subunit RPB2                     | JH650845.1            |
| <i>RPB2</i>    | <i>F. oxysporum</i> f. sp. radicis-lycopersici 26381 | FOCG_04994              | DNA-directed RNA polymerase II subunit RPB2                     | JH651387.1            |
| <i>RPB2</i>    | <i>F. avenaceum</i> Fa05001                          | FAVG_100503             | Hypothetical protein                                            | JPYM01000001.1        |
| <i>RPB2</i>    | <i>F. acuminatum</i> CS5907                          | BN851_0029680           |                                                                 | CBMG010000552.1       |
| <i>RPB2</i>    | <i>F. pseudograminearum</i> CS3096                   | FPSE_00366              | Hypothetical protein                                            | AFNW01000008.1        |
| <i>RPB2</i>    | <i>F. culmorum</i> CS7071                            | BN852_0028830           |                                                                 | CBMH010000367.1       |
| <i>RPB2</i>    | <i>F. graminearum</i> PH-1                           | FGSG_02659              | DNA-directed RNA polymerase                                     | CM000574.1            |
| <i>RPB2</i>    | <i>F. graminearum</i> CS3005                         | FG05_02659              | Hypothetical protein                                            | JATU01000019.1        |
| <i>RPB2</i>    | <i>F. langsethiae</i> FI201059                       | FLAG_102775             | DNA-directed RNA polymerase II subunit RPB2                     | JXCE01000028.1        |
| <i>RPB2</i>    | <i>F. poae</i> 2516                                  | FPOA_02651              | Hypothetical protein                                            | LYXU01000001.1        |
| <i>RPB2</i>    | <i>F. sambucinum</i> F-4                             |                         |                                                                 | LSRD01000041.1        |
| <i>RPB2</i>    | <i>F. equiseti</i> CS3069                            | BN850_0013520           |                                                                 | CBM010000268.1        |
| <i>RPB2</i>    | <i>F. solani</i> f. pisi 77-13-4                     | NECHADRAFT_70495        | Hypothetical protein                                            | GG698912.1            |
| <i>RPB2</i>    | <i>M. anisopliae</i> ARSEF 23                        | MAA_00336               | DNA-dependent RNA polymerase II beta subunit                    | ADNJ02000003.1        |
| <i>RPB2</i>    | <i>M. acridum</i> CQMa 102                           | MAC_02463               | DNA-dependent RNA polymerase II beta subunit                    | GL698481.1            |
| <i>RPB2</i>    | <i>B. bassiana</i> ARSEF 2860                        | BBA_10291               | DNA-dependent RNA polymerase II beta subunit                    | JH725267.1            |
| <i>RPB2</i>    | <i>C. salicis</i> CBS 607.94                         | CSAL01_03721            | DNA-directed RNA polymerase II subunit RPB2                     | JFFI01001504.1        |
| <i>RPB2</i>    | <i>C. simmondsii</i> CBS122122                       | CSIM01_13490            | DNA-directed RNA polymerase II subunit RPB2                     | JFBX01000673.1        |
| <i>RPB2</i>    | <i>C. nymphaeae</i> SA-01                            | CNYM01_12501            | DNA-directed RNA polymerase II subunit RPB2                     | JEMN01001610.1        |
| <i>RPB2</i>    | <i>C. fioriniae</i> PJ7                              | CFIO01_11396            | DNA-directed RNA polymerase II subunit RPB2                     | JARH01001071.1        |
| <i>RPB2</i>    | <i>C. higginsianum</i> IMI 349063                    | CH063_00471             | DNA-directed RNA polymerase II subunit RPB2                     | CACQ02006013.1        |
| <i>RPB2</i>    | <i>C. tofieldiae</i> 0861 Ct v4                      | CT0861_11606            | DNA-directed RNA polymerase II subunit RPB2                     | LFIV01000346.1        |
| <i>RPB2</i>    | <i>C. graminicola</i> M1.001                         | GLRG_03562              | RNA polymerase Rpb2                                             | GG697340.1            |
| <i>RPB2</i>    | <i>C. orbiculare</i> MAFF 240422                     | Cob_08568               | DNA-directed RNA polymerase II subunit RPB2                     | KB725924.1            |
| <i>RPB2</i>    | <i>V. dahliae</i> VdLs.17                            | VDAG_05625              | DNA-directed RNA polymerase II subunit RPB2                     | DS572704.1            |
| <i>RPB2</i>    | <i>N. crassa</i> OR74A                               | NCU05120                | DNA-dependent RNA polymerase II RPB140                          | CM002241.1            |
| <i>RPB2</i>    | <i>M. grisea</i> 70-15                               | MGG_04714               | DNA-directed RNA polymerase II subunit RPB2                     | CM001231.1            |
| <i>RPB2</i>    | <i>S. cerevisiae</i> S288c                           |                         |                                                                 | BK006948.2            |
| <i>b-ANK</i>   | <i>F. graminearum</i> CS3005                         | FG05_10994              | Hypothetical protein                                            | CM002653.1            |
| <i>b-ANK</i>   | <i>F. culmorum</i> CS7071                            | BN852_0075430           |                                                                 | CBMH010001032.1       |
| <i>b-ANK</i>   | <i>F. pseudograminearum</i> CS3096                   | FPSE_02489              | Hypothetical protein                                            | AFNW01000059.1        |
| <i>b-ANK</i>   | <i>F. oxysporum</i> FOSC 3-a                         | FQYG_10529              | Hypothetical protein                                            | AFML01000090.1        |
| <i>b-ANK</i>   | <i>F. acuminatum</i> CS5907                          |                         |                                                                 | CBMG010001915.1       |
| <i>b-ANK</i>   | <i>F. avenaceum</i> Fa05001                          |                         |                                                                 | JPYM01000019.1        |
| <i>b-ANK</i>   | <i>F. langsethiae</i> FI201059                       | FLAG1_11245             | Hypothetical protein                                            | JXCE01000791          |
| <i>b-ANK</i>   | <i>C. tofieldiae</i> 0861                            | CT0861_10344            | Ankyrin repeat-containing protein                               | LFIV01000182.1        |
| <i>b-ANK</i>   | <i>C. simmondsii</i> CBS122122                       | CSIM01_03349            | Hypothetical protein                                            | JFBX01000347.1        |
| <i>b-ANK</i>   | <i>C. nymphaeae</i> SA-01                            | CNYM01_01474            | Hypothetical protein                                            | JEMN01001464.1        |
| <i>b-ANK</i>   | <i>C. fioriniae</i> PJ7                              | CFIO01_03411            | Hypothetical protein                                            | JARH01000413.1        |
| <i>b-ANK</i>   | <i>C. salicis</i> CBS 607.94                         | CSAL01_09694            | Hypothetical protein                                            | JFFI01001557.1        |
| <i>Apt2</i>    | <i>F. fujikuroi</i> IMI 58289                        | FFUJ_00012              | Uncharacterized protein                                         | CCT63352.1            |
| <i>b-ANK</i>   | <i>F. langsethiae</i> FI201059                       | FLAG1_08954             | Hypothetical protein                                            | JXCE01000303          |
| <i>TOXE</i>    | <i>Cochliobolus carbonum</i> -AF038874               | TOXE                    | <i>Cochliobolus carbonum</i> TOXE protein                       | AF038874.1            |
| <i>b-ANK</i>   | <i>Bipolaris zeicola</i> 26-R-13                     | COCCADRAFT_113496       | Hypothetical protein                                            | KI965164.1            |
|                |                                                      | CSIM01_03354            | Cytochrome P450                                                 |                       |
|                |                                                      | CSIM01_03353            | RTA1 domain-containing protein                                  |                       |
|                |                                                      | CSIM01_03352            | 3-isopropylmalate dehydrogenase                                 |                       |
|                |                                                      | CSIM01_03351            | Branched-chain-amino-acid aminotransferase                      |                       |
|                |                                                      | CSIM01_03350            | 3-isopropylmalate dehydratase large subunit 2                   |                       |
| <i>CaFGM4</i>  |                                                      | CSIM01_03349            | Ankyrin repeat-containing protein                               |                       |
| <i>CaFGM1</i>  |                                                      | CSIM01_03348            | Cytochrome P450                                                 |                       |
| <i>CaFGM2</i>  | <i>C. simmondsii</i> CBS122122                       | CSIM01_03347            | Peptidoglycan deacetylase                                       | JFBX01000347.1        |
| <i>CaFGM3</i>  |                                                      | CSIM01_03346            | Aspartate aminotransferase                                      |                       |
|                |                                                      | CSIM01_03345            | 2-isopropylmalate synthase                                      |                       |
|                |                                                      | CSIM01_03344            | Major facilitator superfamily                                   |                       |
|                |                                                      | CSIM01_03343            | NRPS                                                            |                       |
|                |                                                      | CSIM01_03342            | C6 zinc finger domain-containing protein                        |                       |
|                |                                                      | CSIM01_03341            | Methylisocitrate lyase                                          |                       |
|                |                                                      | CSIM01_03340            | Fungal transcription factor regulatory middle homology regi     |                       |
|                |                                                      | CSIM01_03339            | Major facilitator superfamily                                   |                       |

### Supplementary References:

1. Seong, K.-Y. et al. Conidial germination in the filamentous fungus *Fusarium graminearum*. *Fungal Genet. Biol.* 45, 389–399 (2008).
2. Zhang, X.-W. et al. In planta stage-specific fungal gene profiling elucidates the molecular strategies of *Fusarium graminearum* growing inside wheat coleoptiles. *Plant Cell* tpc–112 (2012).
3. Zhang, Y. et al. Cellular tracking and gene profiling of *Fusarium graminearum* during maize stalk rot disease development elucidates its strategies in confronting phosphorus limitation in the host apoplast. *PLoS Pathog.* 12, e1005485 (2016).
4. Hansen, F. T. et al. An update to polyketide synthase and non-ribosomal synthetase genes and nomenclature in *Fusarium*. *Fungal Genet. Biol.* 75, 20–29 (2015).
5. Haese, A. et al. Molecular characterization of the enniatin synthetase gene encoding a multifunctional enzyme catalysing N-methyldepsipeptide formation in *Fusarium scirpi*. *Mol. Microbiol.* 7, 905–914 (1993).
6. Xu, Y. et al. Biosynthesis of the cyclooligomer depsipeptide bassianolide, an insecticidal virulence factor of *Beauveria bassiana*. *Fungal Genet. Biol.* 46, 353–364 (2009).
7. Xu, Y. et al. Biosynthesis of the cyclooligomer depsipeptide beauvericin, a virulence factor of the entomopathogenic fungus *Beauveria bassiana*. *Chem. Biol.* 15, 898–907 (2008).
8. Steinchen, W. et al. The bimodular peptide synthetase SidE produces fumarylalanine in the human pathogen *Aspergillus fumigatus*. *Appl. Environ. Microbiol.* AEM–02642 (2013).
9. Cramer, R. A. et al. Disruption of a nonribosomal peptide synthetase in *Aspergillus fumigatus* eliminates gliotoxin production. *Eukaryot. Cell* 5, 972–980 (2006).

10. Wang, B. et al. Unveiling the biosynthetic puzzle of destruxins in *Metarhizium* species. *Proc. Natl. Acad. Sci.* 109, 1287–1292 (2012).
11. Marchler-Bauer, A. et al. CDD: NCBI's conserved domain database. *Nucleic Acids Res.* 43, D222–D226 (2014).
12. Röttig, M. et al. NRPSpredictor2—a web server for predicting NRPS adenylation domain specificity. *Nucleic Acids Res.* 39, W362–W367 (2011).
13. Vasil, Vimla, et al. Rapid production of transgenic wheat plants by direct bombardment of cultured immature embryos. *Nature Biotechnology* **11.12** 1553 (1993).
14. Russell, W. A. Registration of B70 and B73 Parental Lines of Maize1 (Reg. Nos. PL16 and PL17). *Crop Science* **12.5**, 721-721 (1972).
15. Schnable, P. S. et al. The B73 Maize Genome: Complexity, Diversity, and Dynamics. *Science* **326**, 1112–1115 (2009).
16. Zhang, L. et al. Identification and evaluation of resistance to *Fusarium oxysporum* f. sp. cubense tropical race 4 in *Musa acuminata* Pahang. *Euphytica* **214**, (2018).
17. Jin, Y. et al. Genome-wide profiling of sRNAs in the *Verticillium dahliae* -infected *Arabidopsis* roots. *Mycology* **9**, 155–165 (2018).
18. Yuan, T. L. et al. Optimization of transformation system of *Fusarium graminearum*. *Plant Physiol. Commun* **44**, 251–256 (2008).
19. Zhang, D. et al. The pollen receptor kinase LePRK2 mediates growth-promoting signals and positively regulates pollen germination and tube growth. *Plant Physiol.* **148**, 1368–1379 (2008).
