# Supplementary material for: A linear nonribosomal octapeptide from Fusarium graminearum facilitates cell-to-cell invasion of wheat
Source: PubMed Central journal article supplement (PMC6389888; doi:10.1038/s41467-019-08726-9), 2019-02-25
Supplement: 41467_2019_8726_MOESM3_ESM.pdf [file 41467_2019_8726_MOESM3_ESM.pdf]

## **Description of Additional Supplementary Files**

File Name: Supplementary Data 1

Description: Fusaoctaxin A characterization data

File Name: Supplementary Data 2

Description: Expression data of wheat genes suppressed or induced by fusaoctaxin A

File Name: Supplementary Data 3

Description: Source data containing the raw data underlying all reported averages in graphs and charts and uncropped versions of gels and blots presented in this report.

File Name: Supplementary Data 4

Description: Chemical Structure nature template.cdx
